# Supplementary material
Source: HighWire-hosted journal article supplement (https://bmjopen.bmj.com/content/12/6/e056680)
Supplement: inline-supplementary-material-1 [file inline-supplementary-material-1.pdf]

**Table S1.** Search term in PubMed, Web of Science, Embase, Wanfang, and China National Knowledge Infrastructure databases.

---

(meta-analysis OR review OR systematic review OR systematic overview)

---

AND

---

(stroke OR cerebral infarction OR ischemic stroke OR cerebral hemorrhage OR hemorrhagic stroke)

---

AND

---

((association OR associated OR relationship OR related OR risk ) OR ( diet OR dietetic OR diets OR dietary) OR (nutrition OR nutrient) OR (food OR food group OR food cluster) OR beverage) OR ( cereal OR grain OR corn OR wholegrain OR soy OR soya OR whole wheat OR potatoes OR granary OR tuber OR pulses OR legumes OR lentils OR beans OR rice OR quinoa OR fruit and vegetable OR milk OR dairy OR dairy products OR yogurt OR cheese OR cream OR egg OR meat OR pork OR lamb OR chicken OR poultry OR beef OR turkey OR duck OR fish OR seafood OR shellfish OR salt OR oil OR butter OR margarine OR nut OR desert OR sweets OR candy OR chocolate) OR (alcohol OR caffeine OR coffee OR tea OR juice OR beer OR lemonade OR drinks OR drinking OR wine OR liquor OR sugar sweetened beverage) OR (dietary pattern OR mediterranean OR vegetarian OR dietary approaches to stop hypertension ) OR (macronutrient OR fat OR fatty acid OR carbohydrate OR fiber OR fiber OR cholesterol OR starch OR fructose OR protein) OR (micronutrient OR vitamin OR mineral OR calcium OR flavonoid OR iron OR iodine OR zinc OR selenium OR copper OR manganese OR chromium OR cobalt OR pantothenic acid OR folic acid OR potassium OR sodium OR folate OR magnesium) OR (physical OR exercise OR walking OR weight OR obesity OR blood pressure OR pulse pressure OR sleep OR smoking OR drug OR work OR rest) OR (emotion OR mental OR depression OR despondent OR social isolation OR anger OR hostility) OR (traffic OR pollution ))

---

**Table S2.** Criteria for quality of evidence classification in observed studies.

| Category                   | Criteria                                                                                                                                                              |
|----------------------------|-----------------------------------------------------------------------------------------------------------------------------------------------------------------------|
| Strong evidence            | No. of cases > 1,000<br>$P < 1 \times 10^{-6}$<br>$I^2 < 50\%$<br>95% prediction interval excluding the null<br>No small-study effects<br>No excess significance bias |
| Highly suggestive evidence | No. of cases > 1,000<br>$P < 1 \times 10^{-6}$<br>Largest study with a statistically significant effect                                                               |
| Suggestive evidence        | No. of cases > 1,000<br>$P < 1 \times 10^{-6}$                                                                                                                        |
| Weak evidence              | $P < 0.05$                                                                                                                                                            |
| No significant evidence    | $P > 0.05$                                                                                                                                                            |

**Table S3.** List of excluded studies

| Eligibility in the basis of full article review                                                 | n <sup>ref</sup>    |
|-------------------------------------------------------------------------------------------------|---------------------|
| Not the largest and most comprehensive systematic review and meta-analysis assessing the effect | 53 <sup>1-53</sup>  |
| Not especially for purposed exposure                                                            | 4 <sup>54-57</sup>  |
| Not the outcomes                                                                                | 2 <sup>58-59</sup>  |
| Not cohort study included                                                                       | 2 <sup>60-61</sup>  |
| Not modifiable factors reported                                                                 | 10 <sup>62-70</sup> |
| Full-text not available                                                                         | 1 <sup>71</sup>     |

**Table S4.** List of excluded studies according to each exposure.

| Exposure                  | Searched (n <sup>ref</sup> ) | Excluded (n <sup>ref</sup> reasons)                               |
|---------------------------|------------------------------|-------------------------------------------------------------------|
| <b>Food factors</b>       |                              |                                                                   |
| Fruit and vegetable       | 2 <sup>1 72</sup>            | 1 <sup>1</sup> (not the largest and most comprehensive)           |
| Salt                      | 2 <sup>54 55</sup>           | 1 <sup>54</sup> (not the largest and most comprehensive)          |
| Olive oil                 | 1 <sup>73</sup>              | NA                                                                |
| Legumes                   | 2 <sup>2 74</sup>            | 1 <sup>2</sup> (not the largest and most comprehensive)           |
| Whole grain               | 1 <sup>75</sup>              | NA                                                                |
| Refined grain             | 1 <sup>76</sup>              | NA                                                                |
| Milk                      | 4 <sup>3-5 77</sup>          | 3 <sup>3-5</sup> (not the largest and most comprehensive)         |
| Low fat milk              | 4 <sup>3-5 77</sup>          | 3 <sup>3-5</sup> (not the largest and most comprehensive)         |
| High fat milk             | 4 <sup>3-5 77</sup>          | 3 <sup>3-5</sup> (not the largest and most comprehensive)         |
| Yogurt                    | 4 <sup>3-5 77</sup>          | 3 <sup>3-5</sup> (not the largest and most comprehensive)         |
| Fermented dairy           | 4 <sup>3-5 77</sup>          | 3 <sup>3-5</sup> (not the largest and most comprehensive)         |
| Low fat dairy             | 4 <sup>3-5 77</sup>          | 3 <sup>3-5</sup> (not the largest and most comprehensive)         |
| High fat dairy            | 4 <sup>3-5 77</sup>          | 3 <sup>3-5</sup> (not the largest and most comprehensive)         |
| Soy                       | 1 <sup>78</sup>              | NA                                                                |
| Nuts                      | 2 <sup>2 79</sup>            | 1 <sup>2</sup> (not the largest and most comprehensive)           |
| Cheese                    | 2 <sup>3 4</sup>             | 1 <sup>4</sup> (not the largest and most comprehensive)           |
| Cream                     | 2 <sup>3 4</sup>             | 1 <sup>4</sup> (not the largest and most comprehensive)           |
| Butter                    | 2 <sup>3 4</sup>             | 1 <sup>4</sup> (not the largest and most comprehensive)           |
| Total meat                | 2 <sup>6 57</sup>            | 1 <sup>6</sup> (not the largest and most comprehensive)           |
| Red meat                  | 2 <sup>6 57</sup>            | 1 <sup>6</sup> (not the largest and most comprehensive)           |
| Processed meat            | 2 <sup>6 57</sup>            | 1 <sup>6</sup> (not the largest and most comprehensive)           |
| White meat                | 2 <sup>6 57</sup>            | 1 <sup>6</sup> (not the largest and most comprehensive)           |
| Chocolate                 | 3 <sup>7 8 80</sup>          | 2 <sup>7 8</sup> (not the largest and most comprehensive)         |
| Poultry                   | 2 <sup>57 81</sup>           | 1 <sup>57</sup> (not especially for poultry)                      |
| Fish                      | 8 <sup>9-14 57 82</sup>      | 7 <sup>9-14 57</sup> (not the largest and most comprehensive)     |
| Lean fish                 | 8 <sup>9-14 57 82</sup>      | 7 <sup>9-14 57</sup> (not the largest and most comprehensive)     |
| Fatty fish                | 8 <sup>9-14 57 82</sup>      | 7 <sup>9-14 57</sup> (not the largest and most comprehensive)     |
| Shellish                  | 8 <sup>9-14 57 82</sup>      | 7 <sup>9-14 57</sup> (not the largest and most comprehensive)     |
| Egg                       | 5 <sup>10 11 15 16 83</sup>  | 4 <sup>10 11 15 16</sup> (not the largest and most comprehensive) |
| <b>Beverages</b>          |                              |                                                                   |
| Tea                       | 2 <sup>17 84</sup>           | 1 <sup>17</sup> (not the largest and most comprehensive)          |
| Alcohol                   | 10 <sup>18-26 85</sup>       | 9 <sup>18-26</sup> (not the largest and most comprehensive)       |
| Coffee                    | 4 <sup>10 27-29</sup>        | 3 <sup>27-29</sup> (not the largest and most comprehensive)       |
| <b>Dietary behaviours</b> |                              |                                                                   |
| Mediterranean diet        | 1 <sup>86</sup>              | NA                                                                |
| DASH                      | 1 <sup>87</sup>              | NA                                                                |
| <b>Micronutrients</b>     |                              |                                                                   |

|                                               |                             |                                                                   |
|-----------------------------------------------|-----------------------------|-------------------------------------------------------------------|
| Vitamin C                                     | 1 <sup>88</sup>             | NA                                                                |
| Calcium                                       | 3 <sup>30 31 89</sup>       | 2 <sup>30 31</sup> (not the largest and most comprehensive)       |
| Flavonoid                                     | 1 <sup>90</sup>             | NA                                                                |
|                                               |                             | 5 <sup>32-36</sup> (not the largest and most comprehensive)       |
| Potassium                                     | 7 <sup>32-36 56 91</sup>    | 1 <sup>56</sup> (not especially for potassium)                    |
| Vitamin E                                     | 3 <sup>60 92</sup>          | 2 <sup>60</sup> (not cohort)                                      |
| Sodium                                        | 3 <sup>54-56</sup>          | 2 <sup>54 55</sup> (not especially for sodium)                    |
| Vitamin B6                                    | 2 <sup>58 93</sup>          | 1 <sup>58</sup> (not the outcome)                                 |
| Folate                                        | 2 <sup>58 93</sup>          | 1 <sup>58</sup> (not the outcome)                                 |
| Vitamin B12                                   | 2 <sup>58 93</sup>          | 1 <sup>58</sup> (not the outcome)                                 |
| Vitamin D                                     | 1 <sup>94</sup>             | NA                                                                |
| Magnesium                                     | 6 <sup>32 33 37-39 95</sup> | 5 <sup>32 33 37-39</sup> (not the largest and most comprehensive) |
| <b>Macronutrients</b>                         |                             |                                                                   |
| Fiber                                         | 1 <sup>96</sup>             | NA                                                                |
| Carbohydrate                                  | 1 <sup>97</sup>             | NA                                                                |
| Monounsaturated fatty acid                    | 1 <sup>98</sup>             | NA                                                                |
| Protein                                       | 1 <sup>99</sup>             | NA                                                                |
| Cholesterol                                   | 1 <sup>100</sup>            |                                                                   |
| Saturated fat                                 | 3 <sup>40 41 101</sup>      | 2 <sup>40 41</sup> (not the largest and most comprehensive)       |
| <b>Factors of physical health management</b>  |                             |                                                                   |
| Overweight                                    | 2 <sup>23 102</sup>         | 1 <sup>23</sup> (not the largest and most comprehensive)          |
| Obesity                                       | 2 <sup>23 102</sup>         | 1 <sup>23</sup> (not the largest and most comprehensive)          |
| Shift-work                                    | 1 <sup>103</sup>            | NA                                                                |
| Physical activity                             | 5 <sup>42-45 104</sup>      | 4 <sup>42-45</sup> (not the largest and most comprehensive)       |
|                                               |                             | 1 <sup>59</sup> (not the outcome) ;                               |
| PP                                            | 2 <sup>53 59 105</sup>      | 1 <sup>53</sup> (not the largest and most comprehensive)          |
| SBP                                           | 2 <sup>59 105</sup>         | 1 <sup>59</sup> (not the outcome)                                 |
| DBP                                           | 2 <sup>105</sup>            | 1 <sup>59</sup> (not the outcome)                                 |
| Sleep duration                                | 3 <sup>46 47 106</sup>      | 2 <sup>46 47</sup> (not the largest and most comprehensive)       |
| Oral contraceptives                           | 1 <sup>107</sup>            | NA                                                                |
| Anti-inflammatory drugs                       | 1 <sup>108</sup>            | NA                                                                |
| Smoking                                       | 4 <sup>23 48 49 109</sup>   | 3 <sup>23 48 49</sup> (not the largest and most comprehensive)    |
| walking pace                                  | 1 <sup>110</sup>            | NA                                                                |
| <b>Factors of emotional health management</b> |                             |                                                                   |
| Depression                                    | 1 <sup>111</sup>            | NA                                                                |
| Social isolation                              | 1 <sup>112</sup>            | NA                                                                |
| Anger and hostility                           | 1 <sup>113</sup>            | NA                                                                |

**Factors of environmental health management**

|                    |                        |                                                             |
|--------------------|------------------------|-------------------------------------------------------------|
| Road traffic noise | 1 <sup>114</sup>       | NA                                                          |
| PM <sub>2.5</sub>  | 4 <sup>50-52 115</sup> | 3 <sup>50-52</sup> (not the largest and most comprehensive) |
| PM <sub>10</sub>   | 4 <sup>50-52 115</sup> | 3 <sup>50-52</sup> (not the largest and most comprehensive) |
| NO <sub>2</sub>    | 4 <sup>50-52 115</sup> | 3 <sup>50-52</sup> (not the largest and most comprehensive) |

Abbreviations: NA, not available; DASH, dietary approaches to stop hypertension; PP, pulse pressure; SBP, systolic blood pressure; DBP, diastolic blood pressure.

**Table S5.** Main characteristics of included systematic reviews or meta-analyses that evaluate modifiable factors and stroke risk.

| First Author, Year                    | Main Comparison | Exposure     | No. of primary cohort studies | Follow-up duration (years) | No. of participants / No. of cases | AMSTAR 2       |
|---------------------------------------|-----------------|--------------|-------------------------------|----------------------------|------------------------------------|----------------|
| <b>Food factors</b>                   |                 |              |                               |                            |                                    |                |
| He, 2006 <sup>72</sup>                | High vs low     | Intake       | 8                             | 3.09-20.00                 | 257,551 / 4,917                    | Critically low |
| Strazzullo, 2009 <sup>55</sup>        | High vs low     | Intake       | 10                            | 3.50-19.00                 | 154,282 / 5,346                    | Critically low |
| Martínez-González, 2014 <sup>73</sup> | Dose-response   | 25 g/d       | 2                             | 4.80-10.40                 | 31,226 / 543                       | Critically low |
| Shi, 2014 <sup>74</sup>               | High vs low     | Intake       | 5                             | 12.50-26.00                | 173,229 / 4,030                    | Critically low |
| Fang, 2015 <sup>75</sup>              | High vs low     | Intake       | 6                             | 5.50-24.00                 | 247,487 / 1,635                    | Critically low |
| Wu, 2015 <sup>76</sup>                | High vs low     | Intake       | 7                             | 5.50-15.20                 | 410,821 / 8,284                    | Critically low |
|                                       |                 | 200 g/d      | 14                            | 10.00-25.00                | 603,919 / 24,887                   |                |
|                                       |                 | 200 g/d      | 4                             | 10.00-13.60                | 159,547 / 5,942                    |                |
|                                       |                 | 200 g/d      | 4                             | 10.00-13.60                | 159,547 / 5,942                    |                |
| de Goede, 2016 <sup>77</sup>          | Dose-response   | 100 g/d      | 3                             | 13.60-17.30                | 116,555 / 3,894                    | Critically low |
|                                       |                 | 200 g/d      | 5                             | 10.00-17.30                | 160,048 / 7,032                    |                |
|                                       |                 | 200 g/d      | 6                             | 10.00-24.30                | 263,425 / 10,044                   |                |
|                                       |                 | 200 g/d      | 5                             | 10.20-24.30                | 262,643 / 8,990                    |                |
| Lou, 2016 <sup>78</sup>               | High vs low     | Intake       | 3                             | 6.30-14.70                 | 119,884 / 2,032                    | Critically low |
| Shao, 2016 <sup>79</sup>              | Dose-response   | 12 grams/day | 11                            | 4.30-22.70                 | 671,301 / 7,665                    | Critically low |
|                                       |                 | Intake       | 6                             | 10.00-17.30                | 224,101 / 10,483                   |                |
| Gholami, 2017 <sup>3</sup>            | High vs low     | Intake       | 3                             | 10.20-13.60                | 127,962 / 8,546                    | Critically low |
|                                       |                 | Intake       | 3                             | 10.00-13.69                | 111,280 / 5,299                    |                |
|                                       |                 | Intake       | 4                             | 7.50-18.00                 | 213,722 / 8,848                    |                |

|                                  |               |                   |                    |    |             |                    |                |
|----------------------------------|---------------|-------------------|--------------------|----|-------------|--------------------|----------------|
| Kim, 2017 <sup>57</sup>          | High vs low   | Intake            | Red meat           | 5  | 5.50-26.00  | 254,742 / 9,522    |                |
|                                  |               | Intake            | Processed meat     | 5  | 10.10-26.00 | 254,742 / 9,522    | Critically low |
| Yuan, 2017 <sup>80</sup>         | High vs low   | Intake            | White meat         | 2  | 5.50-26.00  | 138,761 / 4,759    |                |
|                                  |               | Intake            | Chocolate          | 7  | 4.70-16.00  | 231,038 / 8,197    | Critically low |
| Mohammadi, 2018 <sup>81</sup>    | High vs low   | Intake            | Poultry            | 5  | 5.50-26.00  | 354,728 / 7,705    | Critically low |
|                                  |               |                   | Fish               | 31 | 4.00-30.00  | 1,145,154 / 32,738 |                |
|                                  |               |                   | Lean fish          | 5  | 4.30-18.00  | 101,594 / 2,966    | Low            |
| Zhao, 2019 <sup>82</sup>         | High vs low   | Intake            | Fatty fish         | 6  | 4.30-18.00  | 125,906 / 3,387    |                |
|                                  |               |                   | Shellfish          | 5  | 4.30-12.00  | 200,046 / 2,152    |                |
|                                  |               | Intake            | Egg                | 16 | 8.80-32.00  | 1,387,653 / 5,8451 | Critically low |
| <b>Beverages</b>                 |               |                   |                    |    |             |                    |                |
| Shen, 2012 <sup>84</sup>         | Dose-response | 3 cups/d          | Tea                | 14 | 4.00-24.00  | 513,804 / 10,192   | Critically low |
| Larsson, 2016 <sup>117</sup>     | High vs low   | Light-to-moderate | Alcohol            | 29 | 3.80-29.10  | 1102642 / 222,825  | Critically low |
|                                  |               | High-to-heavy     |                    |    |             |                    |                |
| Shao, 2021 <sup>29</sup>         | High vs low   | Intake            | Coffee             | 21 | 3.50-28.00  | 2,483,086 / 26,241 | Critically low |
| <b>Dietary behaviors</b>         |               |                   |                    |    |             |                    |                |
| Psaltopoulou, 2013 <sup>86</sup> | High vs low   | Adherence         | Mediterranean diet | 4  | 7.89-20.00  | 152843/ 2560       | Critically low |
| Feng, 2018 <sup>87</sup>         | High vs low   | Adherence         | DASH               | 12 | 7.90-24.00  | 548,632 / 15,270   | Critically low |
| <b>Micronutrients</b>            |               |                   |                    |    |             |                    |                |
| Chen, 2013 <sup>88</sup>         | High vs low   | Intake            | Vitamin C          | 12 | 6.10-30.00  | 217,454 / 3,762    | Critically low |
| Larsson, 2013 <sup>89</sup>      | Dose-response | < 700 mg/d        | Calcium            | 5  | 9.60-22.0   | 153,280 / 2,634    | Critically low |
|                                  |               | > 700 mg/d        |                    | 6  | 98.00-13.60 | 250,551 / 6,461    |                |
| Tang, 2016 <sup>90</sup>         | Dose-response | 100 mg/d          | Flavonoid          | 11 | 6.10-28.00  | 356,627 / 5,154    | Critically low |
| Vinceti, 2016 <sup>91</sup>      | High vs low   | Intake            | Potassium          | 16 | 3.70-25.80  | 639,440 / 19,522   | Critically low |



|                                              |               |                  |                            |    |             |                    |                |
|----------------------------------------------|---------------|------------------|----------------------------|----|-------------|--------------------|----------------|
| Cheng, 2018 (1) <sup>92</sup>                | High vs low   | Intake           | Vitamin E                  | 9  | 6.10-15.00  | 220,371 / 3,284    | Critically low |
| Jayedi, 2019 <sup>118</sup>                  | Dose-response | 1 gr/d           | Sodium                     | 13 | 4.70-28.00  | 252,985 / 9,503    | Critically low |
| Chen, 2020 <sup>93</sup>                     | High vs low   | Intake           | Vitamin B6                 | 5  | 10.00-16.20 | 264,253 / 7,334    | Critically low |
|                                              |               | Intake           | Folate                     | 10 | 4.20-19.00  | 255,458 / 8,477    |                |
| Shi, 2020 <sup>94</sup>                      | High vs low   | Intake           | Vitamin B12                | 5  | 4.20-14.00  | 130,965 / 5,458    | Low            |
| Zhao, 2020 <sup>95</sup>                     | High vs low   | Intake           | Vitamin D                  | 4  | 10.00-34.00 | 67,238 / 2,616     | Low            |
|                                              |               |                  | Magnesium                  | 15 | NR          | 692,998 / 20138    | Critically low |
| <b>Macronutrients</b>                        |               |                  |                            |    |             |                    |                |
| Chen, 2013 <sup>96</sup>                     | High vs low   | Intake           | Fiber                      | 6  | 6.00-8.00   | 314,864 / 8,920    | Critically low |
| Cai, 2015 <sup>97</sup>                      | Dose-response | 290 g/d          | Carbohydrate               | 4  | 5.00-18.00  | 170,348 / 1,851    | Critically low |
| Cheng, 2016 <sup>98</sup>                    | High vs low   | Intake           | Monounsaturated fatty acid | 10 | 7.60-20.00  | 307,087 / 5,827    | Critically low |
| Zhang, 2016 <sup>119</sup>                   | High vs low   | Intake           | Protein                    | 12 | 5.00-26.00  | 528,982 / 1,1340   | Critically low |
| Cheng, 2018 (2) <sup>100</sup>               | High vs low   | Intake           | Cholesterol                | 7  | 6.10-15.00  | 269,777 / 4,604    | Critically low |
| Kang, 2020 <sup>101</sup>                    | High vs low   | Intake           | Saturated fat              | 14 | 7.40-20.00  | 598,435 / 12,084   | Low            |
| <b>Factors of physical health management</b> |               |                  |                            |    |             |                    |                |
| Strazzullo, 2010 <sup>102</sup>              | High vs low   | With vs without  | Overweight                 | 22 | 7.00-28.00  | 2,159,827 / 2,7357 | Critically low |
|                                              |               |                  | Obesity                    | 22 | 7.00-28.00  | 1,800,924 / 22,279 |                |
| Li 2016 <sup>103</sup>                       | High vs low   | Time             | Shift-work                 | 4  | NR          | 488,699 / 4,231    | Critically low |
| Kyu 2016 <sup>104</sup>                      | High vs low   | Amount           | Physical activity          | 26 | 5.80-16.40  | 1,573,231 / NR     | Critically low |
|                                              |               |                  | PP                         | 6  | 6.50-12.00  | 122,265 / 3,147    |                |
| Liu, 2016 <sup>105</sup>                     | Dose-response | 10 mmHg increase | SBP                        | 6  | 6.50-12.01  | 122,265 / 3,147    | Critically low |
|                                              |               |                  | DBP                        | 6  | 6.50-12.02  | 122,265 / 3,147    |                |
|                                              |               |                  | Sleep duration             | 12 | 7.80-14.70  | 528,653 / 12,193   |                |
| He, 2017 <sup>105</sup>                      | Dose-response | More than 7 h    | Sleep duration             | 12 | 7.80-14.70  | 528,653 / 12,193   | Critically low |
| Xu, 2018 <sup>107</sup>                      | High vs low   | Current vs non   | Oral contraceptives        | 5  | 3.00-11.00  | NR / 1,951         | Critically low |

|                                               |               |                      |                         |    |            |                    |                |
|-----------------------------------------------|---------------|----------------------|-------------------------|----|------------|--------------------|----------------|
| Islam, 2018 <sup>108</sup>                    | High vs low   | With vs without      | Anti-inflammatory drugs | 5  | 2.00-13.00 | 1,578,679 / NR     | Critically low |
| Pan, 2019 <sup>109</sup>                      | High vs low   | Current vs non       | Smoking                 | 9  | 8.00-18.00 | 393,598 / 3,412    | Critically low |
| Quan, 2019 <sup>110</sup>                     | High vs low   | Speed                | Walking pace            | 7  | 5.20-11.90 | 135,645 / 2,229    | Critically low |
| <b>Factors of emotional health management</b> |               |                      |                         |    |            |                    |                |
| Dong, 2012 <sup>111</sup>                     | High vs low   | Scores               | Depression              | 17 | 3.00-29.00 | 206,641 / 6,086    | Critically low |
| Valtorta, 2016 <sup>112</sup>                 | High vs low   | Feeling              | Social isolation        | 8  | 4.00-18.60 | 105,514 / 2,577    | Critically low |
| Chen, 2019 <sup>113</sup>                     | High vs low   | Feeling              | Anger and hostility     | 7  | 2.00-8.50  | 52,277 / NR        | Critically low |
| <b>Factors of environmental management</b>    |               |                      |                         |    |            |                    |                |
| Dzhambov, 2016 <sup>114</sup>                 | Dose-response | 10 dB                | Road traffic noise      | 5  | 7.90-13.00 | 243,145 / 6,672    | Critically low |
| Niu, 2021 <sup>115</sup>                      | Dose-response | 10 µg/m <sup>3</sup> | PM <sub>2.5</sub>       | 8  | 1.00-21.00 | 558,698 / 26,200   |                |
|                                               |               |                      | PM <sub>10</sub>        | 6  | 4.00-21.00 | 1,097,987 / 23,122 | Critically low |
|                                               |               |                      | NO <sub>2</sub>         | 4  | 4.00-25.00 | 1,112,832 / 18,336 |                |

Abbreviations: AMSTAR, assess the methodological quality of systematic reviews; NR, not reported; DASH, dietary approaches to stop hypertension; PP, pulse pressure; SBP, systolic blood pressure; DBP, diastolic blood pressure.

**Table S6.** Modifiable factors and total stroke risk.

| First Author, Year                     | Exposure            | SHR (95% CI)      | P value               | I <sup>2</sup> (%) | τ <sup>2</sup>        | 95% PI       | Egger's P             |    |      |                       |     |
|----------------------------------------|---------------------|-------------------|-----------------------|--------------------|-----------------------|--------------|-----------------------|----|------|-----------------------|-----|
|                                        |                     |                   |                       |                    |                       |              | value                 | O  | E    | P                     | ESF |
| <b>Food factors</b>                    |                     |                   |                       |                    |                       |              |                       |    |      |                       |     |
| He, 2006 <sup>72, a</sup>              | Fruit and vegetable | 0.74 (0.69, 0.79) | < 0.0001              | NA                 | NA                    | NA           | NA                    | NA | NA   | NA                    | NA  |
| Strazzullo, 2009 <sup>55</sup>         | Salt                | 1.25 (1.09, 1.44) | 2.00×10 <sup>-3</sup> | 56.70              | 0.02                  | (0.85, 1.85) | 0.10                  | 3  | 5.97 | 0.12                  | No  |
| Martí nez-González, 2014 <sup>73</sup> | Olive oil           | 0.75 (0.59, 0.96) | 0.02                  | 34.50              | 0.02                  | NA           | NA                    | 2  | NA   | NA                    | NA  |
| Shi, 2014 <sup>74</sup>                | Legumes             | 0.95 (0.84, 1.07) | 0.38                  | 39.40              | 7.40×10 <sup>-3</sup> | (0.67, 1.33) | 0.25                  | 0  | NA   | NA                    | NA  |
| Fang, 2015 <sup>75</sup>               | Whole grain         | 0.90 (0.74, 1.10) | 0.30                  | 31.60              | 0.02                  | (0.56, 1.45) | 0.72                  | 1  | 0.92 | 0.93                  | No  |
| Wu, 2015 <sup>76</sup>                 | Refined grain       | 1.01 (0.93, 1.11) | 0.78                  | 0.00               | < 0.00001             | (0.90, 1.14) | 0.59                  | 0  | 4.65 | 1.38×10 <sup>-3</sup> | Yes |
|                                        | Milk                | 0.90 (0.83, 0.98) | 0.02                  | 80.00              | 0.01                  | (0.69, 1.19) | 0.21                  | 3  | NA   | NA                    | NA  |
|                                        | Low fat milk        | 0.94 (0.83, 1.08) | 0.40                  | 69.00              | 0.01                  | (0.54, 1.66) | 0.61                  | 1  | NA   | NA                    | NA  |
|                                        | High fat milk       | 1.11 (1.02, 1.20) | 0.02                  | 0.00               | < 0.00001             | (0.92, 1.32) | 0.77                  | 1  | NA   | NA                    | NA  |
|                                        | Yogurt              | 1.07 (0.98, 1.16) | 0.15                  | 0.00               | < 0.00001             | (0.61, 1.86) | 0.31                  | 0  | NA   | NA                    | NA  |
| de Goede, 2016 <sup>77</sup>           | Fermented dairy     | 0.92 (0.85, 1.01) | 0.07                  | 72.40              | 6.40×10 <sup>-3</sup> | (0.69, 1.24) | 5.00×10 <sup>-3</sup> | 2  | NA   | NA                    | NA  |
|                                        | Low fat dairy       | 0.97 (0.92, 1.02) | 0.47                  | 59.30              | 7.00×10 <sup>-4</sup> | (0.91, 1.08) | 0.08                  | 2  | NA   | NA                    | NA  |
|                                        | High fat dairy      | 0.97 (0.94, 1.00) | 0.04                  | 0.00               | < 0.00001             | (0.92, 1.02) | 0.97                  | 1  | NA   | NA                    | NA  |
| Lou, 2016 <sup>78</sup>                | Soy                 | 0.94 (0.82, 1.08) | 0.37                  | 0.00               | < 0.00001             | (0.38, 2.29) | 0.93                  | 0  | 0.15 | 0.32                  | No  |
| Shao, 2016 <sup>79</sup>               | Nuts                | 0.89 (0.80, 0.98) | 0.02                  | 8.20               | 2.30×10 <sup>-3</sup> | (0.76, 1.04) | 0.57                  | 1  | NA   | NA                    | NA  |
|                                        | Cheese              | 0.93 (0.88, 0.99) | 0.02                  | 0.00               | < 0.00001             | (0.86, 1.01) | 0.99                  | 0  | 1.44 | 0.23                  | No  |
| Gholami, 2017 <sup>3</sup>             | Cream               | 0.91 (0.78, 1.07) | 0.26                  | 82.60              | 0.02                  | (0.14, 5.90) | 0.35                  | 1  | 0.15 | 1.28×10 <sup>-8</sup> | Yes |
|                                        | Butter              | 0.97 (0.88, 1.08) | 0.59                  | 13.80              | 1.20×10 <sup>-3</sup> | (0.45, 2.12) | 0.15                  | 0  | NA   | NA                    | NA  |
|                                        | Total meat          | 1.18 (1.09, 1.28) | < 0.0001              | 0.00               | < 0.00001             | (0.99, 1.41) | 0.50                  | 2  | NA   | NA                    | NA  |

|                                  |                           |                   |                       |       |                       |              |                       |    |       |                       |     |
|----------------------------------|---------------------------|-------------------|-----------------------|-------|-----------------------|--------------|-----------------------|----|-------|-----------------------|-----|
| Kim, 2017 <sup>57</sup>          | Red meat                  | 1.11 (1.03, 1.20) | $6.00 \times 10^{-3}$ | 0.90  | $1.00 \times 10^{-4}$ | (0.98, 1.26) | 0.75                  | 2  | NA    | NA                    | NA  |
|                                  | Processed meat            | 1.16 (1.07, 1.26) | < 0.0001              | 15.90 | $1.40 \times 10^{-3}$ | (0.97, 1.39) | 0.40                  | 3  | NA    | NA                    | NA  |
|                                  | White meat                | 0.87 (0.78, 0.96) | $8.00 \times 10^{-3}$ | 0.00  | < 0.00001             | NA           | NA                    | 1  | NA    | NA                    | NA  |
| Yuan, 2017 <sup>80</sup>         | Chocolate                 | 0.83 (0.77, 0.89) | < 0.0001              | 0.00  | < 0.00001             | (0.75, 0.92) | $2.00 \times 10^{-3}$ | 5  | 2.62  | 0.15                  | No  |
| Mohammadi, 2018 <sup>81</sup>    | Poultry                   | 0.97 (0.85, 1.12) | 0.71                  | 50.40 | 0.01                  | (0.64, 1.47) | 0.25                  | 1  | NA    | NA                    | NA  |
|                                  | Fish                      | 0.91 (0.86, 0.97) | $2.00 \times 10^{-3}$ | 47.60 | 0.01                  | (0.73, 1.13) | 0.18                  | 7  | 12.30 | 0.19                  | No  |
| Zhao, 2019 <sup>82</sup>         | Lean fish                 | 0.84 (0.69, 1.02) | 0.08                  | 0.00  | < 0.00001             | (0.61, 1.15) | 0.42                  | 1  | 0.25  | $3.10 \times 10^{-3}$ | Yes |
|                                  | Fatty fish                | 0.89 (0.76, 1.05) | 0.17                  | 29.50 | 0.01                  | (0.61, 1.30) | 1.00                  | 1  | 1.17  | 0.87                  | No  |
|                                  | Shellfish                 | 0.97 (0.82, 1.15) | 0.76                  | 20.90 | $7.90 \times 10^{-3}$ | (0.66, 1.45) | 0.39                  | 1  | 1.16  | 0.87                  | No  |
| Tang, 2020 <sup>116</sup>        | Egg                       | 0.96 (0.87, 1.06) | 0.44                  | 74.10 | 0.02                  | (0.69, 1.34) | 0.81                  | 5  | 7.03  | 0.46                  | No  |
| <b>Beverages</b>                 |                           |                   |                       |       |                       |              |                       |    |       |                       |     |
| Shen, 2012 <sup>84</sup>         | Tea                       | 0.80 (0.70, 0.91) | $1.00 \times 10^{-3}$ | 59.00 | 0.03                  | (0.52, 1.21) | 0.49                  | 6  | NA    | NA                    | NA  |
| Larsson, 2016 <sup>117, a</sup>  | Light-to-moderate Alcohol | 0.98 (0.87, 1.10) | NA                    | NA    | NA                    | NA           | NA                    | NA | NA    | NA                    | NA  |
|                                  | High-to-heavy Alcohol     | 1.32 (1.03, 1.70) | NA                    | NA    | NA                    | NA           | NA                    | NA | NA    | NA                    | NA  |
| Shao, 2021 <sup>29</sup>         | Coffee                    | 0.86 (0.79, 0.94) | $1.00 \times 10^{-3}$ | 39.80 | 0.01                  | (0.66, 1.13) | 0.06                  | 7  | 2.24  | 0.02                  | Yes |
| <b>Dietary behaviours</b>        |                           |                   |                       |       |                       |              |                       |    |       |                       |     |
| Psaltopoulou, 2013 <sup>86</sup> | Mediterranean diet        | 0.80 (0.67, 0.95) | $9.00 \times 10^{-3}$ | 25.30 | $8.20 \times 10^{-3}$ | (0.46, 1.37) | 0.76                  | 1  | 1.00  | 1.00                  | No  |
| Feng, 2018 <sup>87</sup>         | DASH                      | 0.87 (0.81, 0.93) | < 0.0001              | 48.90 | $5.30 \times 10^{-3}$ | (0.72, 1.04) | 0.16                  | 7  | NA    | NA                    | NA  |
| <b>Micronutrients</b>            |                           |                   |                       |       |                       |              |                       |    |       |                       |     |
| Chen, 2013 <sup>88</sup>         | Vitamin C                 | 0.81 (0.73, 0.90) | < 0.0001              | 3.10  | $1.00 \times 10^{-3}$ | (0.71, 0.93) | 0.62                  | 3  | 0.75  | $2.04 \times 10^{-3}$ | Yes |
| Larsson, 2013 <sup>89, a</sup>   | Calcium (< 700 mg/d)      | 0.82 (0.76, 0.88) | NA                    | 0.00  | NA                    | NA           | NA                    | 3  | NA    | NA                    | NA  |
|                                  | Calcium (> 700 mg/d)      | 1.03 (1.01, 1.06) | NA                    | 0.00  | NA                    | NA           | NA                    | 2  | NA    | NA                    | NA  |
| Tang, 2016 <sup>90</sup>         | Flavonoid                 | 0.89 (0.82, 0.97) | $5.00 \times 10^{-3}$ | 0.00  | < 0.00001             | (0.81, 0.98) | 0.24                  | 1  | NA    | NA                    | NA  |
| Vinceti, 2016 <sup>91</sup>      | Potassium                 | 0.91 (0.83, 1.00) | 0.04                  | 64.80 | 0.02                  | (0.66, 1.24) | 0.67                  | 6  | 2.18  | 0.04                  | Yes |

|                                              |                            |                   |          |       |                       |               |                       |    |      |                        |     |
|----------------------------------------------|----------------------------|-------------------|----------|-------|-----------------------|---------------|-----------------------|----|------|------------------------|-----|
| Cheng, 2018 (1) <sup>92</sup>                | Vitamin E                  | 0.87 (0.73, 1.03) | 0.09     | 35.70 | 0.02                  | (0.58, 1.29)  | 0.88                  | 2  | NA   | NA                     | NA  |
| Jayedi, 2019 <sup>118</sup>                  | Sodium                     | 1.15 (1.07, 1.23) | < 0.0001 | 51.90 | 7.50×10 <sup>-3</sup> | (0.93, 1.41)  | 0.12                  | 2  | NA   | NA                     | NA  |
| Chen, 2020 <sup>93</sup>                     | Vitamin B6                 | 0.85 (0.70, 1.03) | 0.09     | 68.80 | 0.03                  | (0.46, 1.55)  | 0.95                  | 1  | 3.66 | 0.02                   | Yes |
|                                              | Folate                     | 0.90 (0.80, 1.01) | 0.07     | 37.60 | 0.01                  | (0.68, 1.19)  | 0.17                  | 4  | 0.50 | 2.04×10 <sup>-12</sup> | Yes |
| Shi, 2020 <sup>94</sup>                      | Vitamin B12                | 1.02 (0.88, 1.19) | 0.80     | 26.60 | 8.50×10 <sup>-3</sup> | (0.69, 1.50)  | 0.96                  | 0  | 2.26 | 0.09                   | Yes |
|                                              | Vitamin D                  | 0.75 (0.57, 0.98) | 0.04     | 49.00 | 0.03                  | (0.26, 2.03)  | 0.88                  | 3  | 1.53 | 0.18                   | No  |
| Zhao, 2020 <sup>95</sup>                     | Magnesium                  | 0.89 (0.83, 0.94) | < 0.0001 | 1.20  | 2.00×10 <sup>-4</sup> | (0.82, 0.95)  | 5.00×10 <sup>-3</sup> | 2  | NA   | NA                     | NA  |
| <b>Macronutrients</b>                        |                            |                   |          |       |                       |               |                       |    |      |                        |     |
| Chen, 2013 <sup>96</sup>                     | Fiber                      | 0.88 (0.78, 1.00) | 0.05     | 40.00 | 9.00×10 <sup>-3</sup> | (0.64, 1.21)  | 0.50                  | 1  | NA   | NA                     | NA  |
| Cai, 2015 <sup>97</sup>                      | Carbohydrate               | 1.20 (0.95, 1.50) | 0.12     | 50.00 | 0.03                  | (0.51, 2.81)  | 0.60                  | 1  | NA   | NA                     | NA  |
| Cheng, 2016 <sup>98</sup>                    | Monounsaturated fatty acid | 0.89 (0.80, 0.98) | 0.02     | 33.00 | 7.30×10 <sup>-3</sup> | (0.71, 1.12)  | 0.90                  | 2  | 1.15 | 0.43                   | No  |
| Zhang, 2016 <sup>119</sup>                   | Protein                    | 0.96 (0.90, 1.03) | 0.26     | 70.30 | 5.00×10 <sup>-3</sup> | (0.81, 1.15)  | 0.16                  | 4  | NA   | NA                     | NA  |
| Cheng, 2018 (2) <sup>100</sup>               | Cholesterol                | 0.97 (0.77, 1.22) | 0.80     | 56.00 | 0.04                  | (0.52, 1.80)  | 0.10                  | 2  | 0.95 | 0.24                   | No  |
| Kang, 2020 <sup>101</sup>                    | Saturated fat              | 0.88 (0.79, 0.98) | 0.02     | 45.90 | 0.01                  | (0.67, 1.16)  | 0.46                  | 5  | NA   | NA                     | NA  |
| <b>Factors of physical health management</b> |                            |                   |          |       |                       |               |                       |    |      |                        |     |
| Strazzullo, 2010 <sup>102, a</sup>           | Overweight                 | 1.22 (1.05, 1.41) | 0.01     | 89.00 | NA                    | NA            | NA                    | NA | NA   | NA                     | NA  |
|                                              | Obesity                    | 1.64 (1.36, 1.99) | < 0.0001 | 88.00 | NA                    | NA            | NA                    | NA | NA   | NA                     | NA  |
| Li 2016 <sup>103</sup>                       | Shift-work                 | 1.04 (0.98, 1.10) | 0.18     | 3.70  | 5.00×10 <sup>-4</sup> | (0.89, 1.22)  | 0.24                  | 0  | NA   | NA                     | NA  |
| Kyu 2016 <sup>104, a</sup>                   | Physical activity          | 0.80 (0.70, 0.90) | NA       | NA    | NA                    | NA            | NA                    | NA | NA   | NA                     | NA  |
|                                              | PP                         | 1.14 (1.09, 1.20) | < 0.0001 | 35.40 | 1.10×10 <sup>-3</sup> | (1.02, 1.28)  | 0.47                  | 5  | NA   | NA                     | NA  |
| Liu, 2016 <sup>105</sup>                     | SBP                        | 1.22 (1.11, 1.35) | < 0.0001 | 85.30 | 0.01                  | (0.88, 1.69)  | 0.33                  | 5  | NA   | NA                     | NA  |
|                                              | DBP                        | 1.23 (1.12, 1.35) | < 0.0001 | 71.00 | 8.10×10 <sup>-3</sup> | (0.93, 1.63)  | 0.60                  | 5  | NA   | NA                     | NA  |
| He, 2017 <sup>105</sup>                      | Sleep duration             | 1.38 (1.20, 1.58) | < 0.0001 | 67.30 | 0.04                  | (0.88, 2.15)  | 0.47                  | 9  | NA   | NA                     | NA  |
| Xu, 2018 <sup>107</sup>                      | Oral contraceptives        | 1.30 (0.59, 2.89) | 0.52     | 85.60 | 0.70                  | (0.07, 25.26) | 0.60                  | 3  | NA   | NA                     | NA  |

|                                               |                         |                   |                       |       |                       |              |      |   |      |                       |     |
|-----------------------------------------------|-------------------------|-------------------|-----------------------|-------|-----------------------|--------------|------|---|------|-----------------------|-----|
| Islam, 2018 <sup>108</sup>                    | Anti-inflammatory drugs | 1.59 (1.13, 2.25) | $8.00 \times 10^{-3}$ | 89.70 | 0.12                  | (0.46, 5.47) | 0.84 | 3 | NA   | NA                    | NA  |
| Pan, 2019 <sup>109</sup>                      | Smoking                 | 1.71 (1.37, 2.13) | < 0.0001              | 72.80 | 0.06                  | (0.89, 3.28) | 0.07 | 6 | NA   | NA                    | NA  |
| Quan, 2019 <sup>110</sup>                     | Walking pace            | 0.56 (0.48, 0.65) | < 0.0001              | 0.00  | < 0.00001             | (0.46, 0.69) | 1.00 | 4 | 3.07 | 0.57                  | No  |
| <b>Factors of emotional health management</b> |                         |                   |                       |       |                       |              |      |   |      |                       |     |
| Dong, 2012 <sup>111</sup>                     | Depression              | 1.32 (1.17, 1.48) | < 0.0001              | 55.20 | 0.01                  | (0.92, 1.88) | 0.17 | 9 | NA   | NA                    | NA  |
| Valtorta, 2016 <sup>112</sup>                 | Social isolation        | 1.32 (1.03, 1.69) | 0.03                  | 58.00 | 0.06                  | (0.66, 2.64) | 0.04 | 4 | 0.72 | $2.47 \times 10^{-6}$ | Yes |
| Chen, 2019 <sup>113</sup>                     | Anger and hostility     | 1.08 (0.81, 1.45) | 0.60                  | 53.00 | 0.08                  | (0.48, 2.42) | 0.07 | 2 | 1.83 | 0.91                  | No  |
| <b>Factors of environmental management</b>    |                         |                   |                       |       |                       |              |      |   |      |                       |     |
| Dzhambov, 2016 <sup>114</sup>                 | Road traffic noise      | 1.05 (0.96, 1.14) | 0.31                  | 83.60 | $6.50 \times 10^{-3}$ | (0.78, 1.40) | 0.22 | 3 | NA   | NA                    | NA  |
| Niu, 2021 <sup>115</sup>                      | PM <sub>2.5</sub>       | 1.14 (1.08, 1.21) | < 0.0001              | 40.20 | $2.10 \times 10^{-3}$ | (0.78, 1.40) | 0.32 | 5 | NA   | NA                    | NA  |
|                                               | PM <sub>10</sub>        | 1.04 (0.96, 1.13) | 0.35                  | 60.40 | $4.60 \times 10^{-3}$ | (1.01, 1.30) | 0.09 | 2 | NA   | NA                    | NA  |
|                                               | NO <sub>2</sub>         | 0.99 (0.95, 1.02) | 0.51                  | 0.00  | 0.00                  | (0.85, 1.28) | 0.75 | 0 | NA   | NA                    | NA  |

Abbreviations: SHR, summary hazard ratio; O, observed number of significant; E, expected value of significant finding; CI, confidence interval; ESF, Excess significant finding; NA, Not Applicable; DASH, dietary approaches to stop hypertension; PP, pulse pressure; SBP, systolic blood pressure; DBP, diastolic blood pressure.

<sup>a</sup> Summary hazard ratio extracted from published meta-analysis, no re-analysis possible.

**Table S7.** Modifiable factors and ischemic stroke risk.

| First Author, Year             | Main Comparison     | SHR (95% CI)      | <i>P</i> value <sup>b</sup> | <i>I</i> <sup>2</sup> | $\tau^2$              | 95% PI        | Egger's <i>P</i> |    |      |                       |     |
|--------------------------------|---------------------|-------------------|-----------------------------|-----------------------|-----------------------|---------------|------------------|----|------|-----------------------|-----|
|                                |                     |                   |                             |                       |                       |               | value            | O  | E    | <i>P</i>              | ESF |
| <b>Food factors</b>            |                     |                   |                             |                       |                       |               |                  |    |      |                       |     |
| He, 2006 <sup>72, a</sup>      | Fruit and vegetable | 0.72 (0.66, 0.79) | NA                          | NA                    | NA                    | NA            | NA               | NA | NA   | NA                    | NA  |
| Strazzullo, 2009 <sup>55</sup> | Salt                | 1.42 (0.74, 2.75) | 0.29                        | 91.40                 | 0.21                  | NA            | NA               | 1  | 1.87 | 0.01                  | Yes |
| Shi, 2014 <sup>74</sup>        | Legumes             | 0.91 (0.73, 1.13) | 0.39                        | 71.30                 | 0.04                  | (0.35, 2.32)  | 0.17             | 1  | NA   | NA                    | NA  |
| Fang, 2015 <sup>75</sup>       | Whole grain         | 0.83 (0.62, 1.09) | 0.18                        | 38.20                 | 0.02                  | (0.06, 11.92) | 0.89             | 1  | 0.86 | 0.85                  | No  |
| Wu, 2015 <sup>76</sup>         | Refined grain       | 1.04 (0.91, 1.19) | 0.56                        | 0.00                  | 0.00                  | (0.78, 1.39)  | 0.70             | 0  | 0.19 | 0.31                  | No  |
| de Goede, 2016 <sup>77</sup>   | Milk                | 0.92 (0.85, 1.00) | 0.05                        | 56.30                 | 4.60×10 <sup>-3</sup> | (0.72, 1.19)  | 0.55             | 1  | NA   | NA                    | NA  |
|                                | Yogurt              | 0.99 (0.71, 1.40) | 0.97                        | 32.80                 | 0.03                  | NA            | NA               | 0  | NA   | NA                    | NA  |
|                                | Low fat dairy       | 0.93 (0.83, 1.05) | 0.24                        | 69.20                 | 4.90×10 <sup>-3</sup> | NA            | NA               | 1  | NA   | NA                    | NA  |
| Shao, 2016 <sup>79</sup>       | High fat dairy      | 0.96 (0.91, 1.01) | 0.15                        | 0.00                  | 0.00                  | NA            | NA               | 0  | NA   | NA                    | NA  |
|                                | Nuts                | 0.97 (0.73, 1.28) | 0.81                        | 67.50                 | 0.06                  | (0.30, 3.16)  | 0.08             | 2  | NA   | NA                    | NA  |
| Gholami, 2017 <sup>3</sup>     | Cheese              | 0.90 (0.82, 0.98) | 0.01                        | 0.00                  | 0.00                  | NA            | NA               | 0  | 0.45 | 0.29                  | No  |
|                                | Cream               | 0.92 (0.71, 1.18) | 0.50                        | 92.00                 | 0.03                  | NA            | NA               | 1  | 0.24 | 1.30×10 <sup>-3</sup> | Yes |
|                                | Total meat          | 1.17 (1.07, 1.28) | 1.00×10 <sup>-3</sup>       | 0.00                  | 0.00                  | (0.96, 1.43)  | 0.47             | 2  | NA   | NA                    | NA  |
| Kim, 2017 <sup>57</sup>        | Red meat            | 1.14 (0.98, 1.31) | 0.08                        | 49.60                 | 0.01                  | (0.74, 1.74)  | 0.98             | 2  | NA   | NA                    | NA  |
|                                | Processed meat      | 1.17 (1.07, 1.28) | <0.0001                     | 0.00                  | 0.00                  | (1.01, 1.35)  | 0.22             | 2  | NA   | NA                    | NA  |
|                                | White meat          | 0.90 (0.78, 1.03) | 0.11                        | 0.00                  | 0.00                  | NA            | NA               | 0  | NA   | NA                    | NA  |
| Yuan, 2017 <sup>80</sup>       | Chocolate           | 0.87 (0.78, 0.96) | 7.00×10 <sup>-3</sup>       | 0.00                  | 0.00                  | (0.44, 1.70)  | 0.28             | 0  | 0.83 | 0.25                  | No  |
| Mohammadi, 2018 <sup>81</sup>  | Poultry             | 0.91 (0.79, 1.04) | 0.17                        | 0.00                  | 0.00                  | NA            | NA               | 0  | NA   | NA                    | NA  |
| Zhao, 2019 <sup>82</sup>       | Fish                | 0.95 (0.87, 1.05) | 0.31                        | 42.50                 | 0.01                  | (0.74, 1.23)  | 0.32             | 2  | 0.72 | 0.07                  | Yes |
|                                | Lean fish           | 0.73 (0.54, 1.00) | 0.05                        | 0.00                  | 0.00                  | NA            | NA               | 1  | 0.15 | 4.22×10 <sup>-9</sup> | Yes |

|                                  |                       |                   |                       |       |                       |               |      |    |      |                         |     |
|----------------------------------|-----------------------|-------------------|-----------------------|-------|-----------------------|---------------|------|----|------|-------------------------|-----|
|                                  | Fatty fish            | 0.87 (0.66, 1.13) | 0.29                  | 0.00  | 0.00                  | NA            | NA   | 0  | 1.99 | 2.30×10 <sup>-115</sup> | Yes |
| Tang, 2020 <sup>116</sup>        | Egg                   | 0.93 (0.84, 1.04) | 0.19                  | 52.70 | 5.90×10 <sup>-3</sup> | (0.72, 1.21)  | 0.47 | 1  | 1.86 | 0.53                    | No  |
| <b>Beverages</b>                 |                       |                   |                       |       |                       |               |      |    |      |                         |     |
| Shen, 2012 <sup>84</sup>         | Tea                   | 0.76 (0.63, 0.92) | 5.00×10 <sup>-3</sup> | 9.80  | 4.60×10 <sup>-3</sup> | NA            | NA   | 1  | NA   | NA                      | NA  |
| Larsson, 2016 <sup>117, a</sup>  | Light-to-moderate     | 0.91 (0.88, 0.94) | NA                    | 9.10  | NA                    | NA            | NA   | NA | NA   | NA                      | NA  |
|                                  | High-to-heavy Alcohol | 1.09 (1.03, 1.16) | NA                    | .00   | NA                    | NA            | NA   | NA | NA   | NA                      | NA  |
| Shao, 2021 <sup>29</sup>         | Coffee                | 0.89 (0.70, 1.12) | 0.32                  | 73.80 | 0.04                  | (0.33, 2.41)  | 0.05 | 3  | 0.99 | 0.02                    | Yes |
| <b>Dietary behaviors</b>         |                       |                   |                       |       |                       |               |      |    |      |                         |     |
| Psaltopoulou, 2013 <sup>86</sup> | Mediterranean diet    | 0.79 (0.52, 1.20) | 0.27                  | 73.00 | 0.10                  | (0.01, 96.96) | 0.76 | 1  | 0.22 | 3.17×10 <sup>-4</sup>   | Yes |
| Feng, 2018 <sup>87</sup>         | DASH                  | 0.88 (0.80, 0.98) | 0.02                  | 44.20 | 6.20×10 <sup>-3</sup> | (0.68, 1.15)  | 0.20 | 2  | 0.61 | 0.02                    | Yes |
| <b>Micronutrients</b>            |                       |                   |                       |       |                       |               |      |    |      |                         |     |
| Chen, 2013 <sup>88</sup>         | Vitamin C             | 0.78 (0.64, 0.95) | 0.01                  | 32.70 | 0.02                  | (0.46, 1.31)  | 1.78 | 2  | 3.12 | 0.68                    | No  |
| Tang, 2016 <sup>90</sup>         | Flavonoid             | 0.93 (0.80, 1.07) | 0.30                  | 0.00  | 0.00                  | (0.37, 2.35)  | 0.38 | 0  | NA   | NA                      | NA  |
| Vinceti, 2016 <sup>91</sup>      | Potassium             | 0.88 (0.82, 0.95) | 1.00×10 <sup>-3</sup> | 0.00  | 0.00                  | (0.80, 0.97)  | 0.82 | 2  | 0.93 | 0.22                    | No  |
| Cheng, 2018 (1) <sup>92</sup>    | Vitamin E             | 0.90 (0.73, 1.11) | 0.31                  | 14.40 | 6.30×10 <sup>-3</sup> | (0.16, 4.88)  | 0.89 | 0  | NA   | NA                      | NA  |
| Jayedi, 2019 <sup>118</sup>      | Sodium                | 1.42 (0.93, 2.16) | 0.11                  | 84.20 | 0.15                  | (0.21, 9.34)  | 0.29 | 2  | NA   | NA                      | NA  |
|                                  | Vitamin B6            | 1.08 (0.72, 1.64) | 0.71                  | 75.60 | 0.07                  | NA            | NA   | 0  | 1.23 | 0.08                    | Yes |
| Chen, 2020 <sup>93</sup>         | Folate                | 0.83 (0.73, 0.95) | 5.00×10 <sup>-3</sup> | 12.70 | 3.20×10 <sup>-3</sup> | (0.51, 1.69)  | 0.43 | 2  | 0.26 | 2.63×10 <sup>-11</sup>  | Yes |
|                                  | Vitamin B12           | 0.94 (0.74, 1.19) | 0.60                  | 42.50 | 0.02                  | (0.09, 9.75)  | 0.78 | 0  | 0.87 | 0.24                    | No  |
| Shi, 2020 <sup>94</sup>          | Vitamin D             | 0.73 (0.60, 0.89) | 2.00×10 <sup>-3</sup> | .00   | 0.00                  | NA            | NA   | 1  | 0.15 | 4.55×10 <sup>-9</sup>   | Yes |
| Zhao, 2020 <sup>95</sup>         | Magnesium             | 0.89 (0.82, 0.96) | 4.00×10 <sup>-3</sup> | 13.80 | 2.50×10 <sup>-3</sup> | (0.77, 1.03)  | 0.67 | 1  | 0.60 | 0.49                    | No  |
| <b>Macronutrients</b>            |                       |                   |                       |       |                       |               |      |    |      |                         |     |
| Chen, 2013 <sup>96</sup>         | Fiber                 | 0.84 (0.71, 1.00) | 0.05                  | 53.70 | 0.02                  | (0.43, 1.64)  | 0.22 | 1  | NA   | NA                      | NA  |
| Cai, 2015 <sup>97</sup>          | Carbohydrate          | 1.06 (0.76, 1.46) | 0.74                  | 45.80 | 0.04                  | (0.04, 27.54) | 0.09 | 0  | NA   | NA                      | NA  |



|                                               |                       |                   |                       |       |                       |               |      |   |      |      |    |
|-----------------------------------------------|-----------------------|-------------------|-----------------------|-------|-----------------------|---------------|------|---|------|------|----|
| Cheng, 2016 <sup>98</sup>                     | Monounsaturated fatty | 0.92 (0.83, 1.01) | 0.08                  | 9.50  | 2.30×10 <sup>-3</sup> | (0.77, 1.09)  | 0.64 | 1 | NA   | NA   | NA |
| Zhang, 2016 <sup>119</sup>                    | Protein               | 0.95 (0.81, 1.10) | 0.47                  | 75.30 | 0.03                  | (0.59, 1.50)  | 0.27 | 2 | NA   | NA   | NA |
| Cheng, 2018 (2) <sup>100</sup>                | Cholesterol           | 0.98 (0.72, 1.32) | 0.87                  | 71.40 | 0.07                  | (0.36, 2.61)  | 0.16 | 2 | NA   | NA   | NA |
| Kang, 2020 <sup>101</sup>                     | Saturated fat         | 0.89 (0.82, 0.97) | 0.01                  | 17.70 | 3.50×10 <sup>-3</sup> | (0.75, 1.06)  | 0.76 | 3 | NA   | NA   | NA |
| <b>Factors of physical health management</b>  |                       |                   |                       |       |                       |               |      |   |      |      |    |
| Li 2016 <sup>103</sup>                        | Shift-work            | 1.18 (0.81, 1.74) | 0.39                  | 66.40 | 0.06                  | NA            | NA   | 0 | NA   | NA   | NA |
| He, 2017 <sup>105</sup>                       | Sleep duration        | 1.60 (1.32, 1.93) | < 0.0001              | 54.10 | 0.02                  | (0.77, 3.32)  | 0.59 | 3 | NA   | NA   | NA |
| Xu, 2018 <sup>107</sup>                       | Oral contraceptives   | 2.25 (0.44, 11.6) | 0.33                  | 77.60 | 1.12                  | NA            | NA   | 1 | NA   | NA   | NA |
| Pan, 2019 <sup>109</sup>                      | Smoking               | 1.56 (1.34, 1.81) | < 0.0001              | .00   | 0.00                  | (1.26, 1.93)  | 0.46 | 4 | NA   | NA   | NA |
| Quan, 2019 <sup>110</sup>                     | Walking pace          | 0.63 (0.47, 0.85) | 3.00×10 <sup>-3</sup> | 48.60 | 0.05                  | (0.20, 1.96)  | 1.00 | 2 | 2.23 | 0.84 | No |
| <b>Factors of emotional health management</b> |                       |                   |                       |       |                       |               |      |   |      |      |    |
| Dong, 2012 <sup>111</sup>                     | Depression            | 1.44 (1.04, 2.01) | 0.03                  | 41.40 | 0.04                  | (0.05, 39.12) | 0.26 | 2 | NA   | NA   | NA |

Abbreviations: SHR, summary hazard ratio; O, observed number of significant; E, expected value of significant finding; CI, confidence interval; ESF, Excess significant finding; NA, Not Applicable; DASH, dietary approaches to stop hypertension; PP, pulse pressure; SBP, systolic blood pressure; DBP, diastolic blood pressure.

<sup>a</sup> Summary hazard ratio extracted from published meta-analysis, no re-analysis possible.

<sup>b</sup>  $P < 0.025$  was significant after Bonferroni correction.

**Table S8.** Modifiable factors and hemorrhagic stroke risk.

| First Author, Year             | Main Comparison     | SHR (95% CI)      | <i>P</i> value <sup>b</sup> | <i>I</i> <sup>2</sup> | $\tau^2$              | 95% PI       | Egger's        |   |      |                |     |
|--------------------------------|---------------------|-------------------|-----------------------------|-----------------------|-----------------------|--------------|----------------|---|------|----------------|-----|
|                                |                     |                   |                             |                       |                       |              | <i>P</i> value | O | E    | <i>P</i> value | ESF |
| <b>Food factors</b>            |                     |                   |                             |                       |                       |              |                |   |      |                |     |
| He, 2006 <sup>72, a</sup>      | Fruit and vegetable | 0.73 (0.61, 0.87) | NA                          | NA                    | NA                    | NA           | NA             | N | NA   | NA             | NA  |
| Strazzullo, 2009 <sup>55</sup> | Salt                | 1.15 (0.93, 1.42) | 0.20                        | 0.00                  | 0.00                  | NA           | NA             | 0 | 0.44 | 0.29           | No  |
| Shi, 2014 <sup>74</sup>        | Legumes             | 1.16 (0.93, 1.44) | 0.20                        | 0.00                  | 0.00                  | (0.27, 4.87) | 0.09           | 0 | NA   | NA             | NA  |
| Fang, 2015 <sup>75</sup>       | Whole grain         | 1.24 (0.73, 2.10) | 0.42                        | 0.00                  | 0.00                  | NA           | NA             | 0 | 0.18 | 0.31           | No  |
| Wu, 2015 <sup>76</sup>         | Refined grain       | 0.97 (0.82, 1.17) | 0.78                        | 0.00                  | 0.00                  | NA           | NA             | 0 | 0.14 | 0.31           | No  |
| de Goede, 2016 <sup>77</sup>   | Milk                | 0.95 (0.73, 1.24) | 0.69                        | 0.86                  | 0.06                  | (0.28, 3.21) | 0.12           | 2 | NA   | NA             | NA  |
|                                | Low fat dairy       | 0.99 (0.88, 1.12) | 0.89                        | 0.00                  | 0.00                  | NA           | NA             | 0 | NA   | NA             | NA  |
|                                | High fat dairy      | 1.05 (0.93, 1.19) | 0.44                        | 0.00                  | 0.00                  | NA           | NA             | 0 | NA   | NA             | NA  |
| Shao, 2016 <sup>79</sup>       | Nuts                | 1.16 (0.53, 2.51) | 0.71                        | 80.00                 | 0.26                  | NA           | NA             | 0 | NA   | NA             | NA  |
| Gholami, 2017 <sup>3</sup>     | Cheese              | 0.95 (0.78, 1.15) | 0.57                        | 0.00                  | 0.00                  | NA           | NA             | 0 | 0.25 | 0.31           | No  |
|                                | Cream               | 0.89 (0.73, 1.09) | 0.25                        | 0.00                  | 0.00                  | NA           | NA             | 0 | 0.15 | 0.31           | No  |
|                                | Total meat          | 1.18 (0.83, 1.68) | 0.36                        | 59.60                 | 0.07                  | (0.29, 4.80) | 0.88           | 1 | NA   | NA             | NA  |
| Kim, 2017 <sup>57</sup>        | Red meat            | 1.01 (0.81, 1.27) | 0.90                        | 4.60                  | $2.60 \times 10^{-3}$ | (0.59, 1.74) | 0.79           | 0 | NA   | NA             | NA  |
|                                | Processed meat      | 1.19 (0.96, 1.48) | 0.12                        | 2.90                  | $1.50 \times 10^{-3}$ | (0.72, 1.98) | 0.70           | 0 | NA   | NA             | NA  |
|                                | White meat          | 0.70 (0.51, 0.97) | 0.03                        | 0.00                  | 0.00                  | NA           | NA             | 0 | NA   | NA             | NA  |
| Yuan, 2017 <sup>80</sup>       | Chocolate           | 0.83 (0.71, 0.97) | 0.02                        | 0.00                  | 0.00                  | (0.31, 2.24) | 0.42           | 0 | 1.08 | 0.20           | No  |
| Mohammadi, 2018 <sup>81</sup>  | Poultry             | 0.86 (0.62, 1.22) | 0.40                        | 34.70                 | 0.02                  | NA           | NA             | 0 | NA   | NA             | NA  |
| Zhao, 2019 <sup>82</sup>       | Fish                | 0.88 (0.80, 0.97) | 0.01                        | 1.00                  | $3.00 \times 10^{-4}$ | (0.79, 0.99) | 0.99           | 2 | 2.90 | 0.67           | No  |
| Tang, 2020 <sup>116</sup>      | Egg                 | 1.03 (0.72, 1.46) | 0.89                        | 89.60                 | 0.11                  | (0.31, 3.41) | 0.59           | 2 | 3.80 | 0.09           | Yes |
| <b>Beverages</b>               |                     |                   |                             |                       |                       |              |                |   |      |                |     |

|                                  |                            |                   |                       |       |                       |                |      |   |      |                       |     |
|----------------------------------|----------------------------|-------------------|-----------------------|-------|-----------------------|----------------|------|---|------|-----------------------|-----|
| Shen, 2012 <sup>84</sup>         | Tea                        | 0.77 (0.40, 1.49) | 0.44                  | 62.60 | 0.15                  | NA             | NA   | 0 | NA   | NA                    | NA  |
| Larsson, 2016 <sup>117, a</sup>  | Light-to-moderate Alcohol  | 1.04 (0.86, 1.27) | NA                    | 72.10 | NA                    | NA             | NA   | N | NA   | NA                    | NA  |
|                                  | High-to-heavy Alcohol      | 1.49 (1.26, 1.76) | NA                    | 0.00  | NA                    | NA             | NA   | N | NA   | NA                    | NA  |
| Shao, 2021 <sup>29</sup>         | Coffee                     | 1.13 (0.59, 2.16) | 0.72                  | 73.00 | 0.22                  | NA             | 0.61 | 1 | 0.16 | 5.02×10 <sup>-8</sup> | Yes |
| <b>Dietary behaviors</b>         |                            |                   |                       |       |                       |                |      |   |      |                       |     |
| Psaltopoulou, 2013 <sup>86</sup> | Mediterranean diet         | 0.84 (0.61, 1.14) | 0.26                  | 0.00  | 0.00                  | NA             | NA   | 0 | 0.50 | 0.28                  | No  |
| Feng, 2018 <sup>87</sup>         | DASH                       | 0.85 (0.73, 0.99) | 0.04                  | 0.00  | 0.00                  | (0.60, 1.20)   | 0.17 | 0 | 0.66 | 0.29                  | No  |
| <b>Micronutrients</b>            |                            |                   |                       |       |                       |                |      |   |      |                       |     |
| Chen, 2013 <sup>88</sup>         | Vitamin C                  | 0.94 (0.52, 1.69) | 0.84                  | 55.20 | 0.15                  | (0.00, 474.69) | 0.46 | 0 | 0.83 | 0.25                  | No  |
| Tang, 2016 <sup>90</sup>         | Flavonoid                  | 0.89 (0.59, 1.32) | 0.55                  | 53.30 | 0.07                  | (0.01, 58.29)  | 0.34 | 0 | NA   | NA                    | NA  |
| Vinceti, 2016 <sup>91</sup>      | Potassium                  | 0.92 (0.80, 1.07) | 0.29                  | 0.00  | 0.00                  | (0.75, 1.14)   | 0.36 | 0 | 1.07 | 0.27                  | No  |
| Cheng, 2018 (1) <sup>92</sup>    | Vitamin E                  | 0.89 (0.50, 1.58) | 0.70                  | 47.80 | 0.09                  | NA             | NA   | 0 | NA   | NA                    | NA  |
| Jayedi, 2019 <sup>118</sup>      | Sodium                     | 1.20 (0.99, 1.46) | 0.07                  | 0.00  | 0.00                  | (0.78, 1.85)   | 0.10 | 0 | NA   | NA                    | NA  |
|                                  | Vitamin B6                 | 0.91 (0.71, 1.16) | 0.45                  | 0.00  | 0.00                  | NA             | NA   | 0 | 0.29 | 0.31                  | No  |
| Chen, 2020 <sup>93</sup>         | Folate                     | 0.91 (0.68, 1.23) | 0.55                  | 9.20  | 0.01                  | (0.40, 2.07)   | 0.49 | 0 | 0.31 | 0.31                  | No  |
|                                  | Vitamin B12                | 1.08 (0.87, 1.36) | 0.48                  | 0.00  | 0.00                  | (0.25, 4.62)   | 0.56 | 0 | 0.19 | 0.31                  | No  |
| Shi, 2020 <sup>94</sup>          | Vitamin D                  | 0.69 (0.36, 1.29) | 0.24                  | 80.00 | 0.17                  | NA             | NA   | 1 | 1.53 | 0.40                  | No  |
| Zhao, 2020 <sup>95</sup>         | Magnesium                  | 0.93 (0.82, 1.06) | 0.28                  | 0.00  | 0.00                  | (0.79, 1.09)   | 0.62 | 0 | 1.64 | 0.23                  | No  |
| <b>Macronutrients</b>            |                            |                   |                       |       |                       |                |      |   |      |                       |     |
| Chen, 2013 <sup>96</sup>         | Fiber                      | 0.86 (0.70, 1.06) | 0.15                  | 0.00  | 0.00                  | (0.22, 3.35)   | 0.82 | 0 | NA   | NA                    | NA  |
| Cai, 2015 <sup>97</sup>          | Carbohydrate               | 1.58 (1.15, 2.18) | 5.00×10 <sup>-3</sup> | 0.00  | 0.00                  | (0.20, 12.57)  | 0.76 | 2 | NA   | NA                    | NA  |
| Cheng, 2016 <sup>98</sup>        | Monounsaturated fatty acid | 0.68 (0.48, 0.96) | 0.03                  | 0.00  | 0.00                  | (0.32, 1.43)   | 0.76 | 0 | NA   | NA                    | NA  |
| Zhang, 2016 <sup>119</sup>       | Protein                    | 1.03 (0.96, 1.11) | 0.37                  | 2.70  | 7.00×10 <sup>-4</sup> | (0.92, 1.16)   | 0.09 | 0 | NA   | NA                    | NA  |
| Cheng, 2018 (2) <sup>100</sup>   | Cholesterol                | 0.96 (0.70, 1.31) | 0.78                  | 0.00  | 0.00                  | (0.48, 1.92)   | 0.93 | 0 | 0.20 | 0.31                  | No  |

|                                               |                     |                   |                       |       |      |               |      |   |      |      |    |
|-----------------------------------------------|---------------------|-------------------|-----------------------|-------|------|---------------|------|---|------|------|----|
| Kang, 2020 <sup>101</sup>                     | Saturated fat       | 0.58 (0.40, 0.84) | 4.00×10 <sup>-3</sup> | 49.20 | 0.07 | (0.14, 2.34)  | 0.94 | 2 | NA   | NA   | NA |
| <b>Factors of emotional health management</b> |                     |                   |                       |       |      |               |      |   |      |      |    |
| He, 2017 <sup>105</sup>                       | Sleep duration      | 1.19 (0.97, 1.48) | 0.10                  | 0.00  | 0.00 | (0.75, 1.90)  | 0.79 | 0 | NA   | NA   | NA |
| Xu, 2018 <sup>107</sup>                       | Oral contraceptives | 1.10 (0.42, 2.88) | 0.84                  | 85.40 | 0.99 | (0.03, 37.62) | NA   | 2 | NA   | NA   | NA |
| Pan, 2019 <sup>109</sup>                      | Smoking             | 1.32 (1.06, 1.64) | 0.01                  | 35.70 | 0.03 | (0.80, 2.18)  | 0.21 | 1 | NA   | NA   | NA |
| Quan, 2019 <sup>110</sup>                     | Walking pace        | 0.47 (0.27, 0.82) | 8.00×10 <sup>-3</sup> | 14.10 | 0.03 | NA            | NA   | 1 | 0.55 | 0.37 | No |

Abbreviations: SHR, summary hazard ratio; O, observed number of significant; E, expected value of significant finding; CI, confidence interval; ESF, Excess significant finding; NA, Not Applicable; DASH, dietary approaches to stop hypertension; PP, pulse pressure; SBP, systolic blood pressure; DBP, diastolic blood pressure.

<sup>a</sup> Summary hazard ratio extracted from published meta-analysis, no re-analysis possible.

<sup>b</sup>  $P < 0.025$  was significant after Bonferroni correction.

**Table S9.** Detailed evaluation of the methodological quality with AMSTAR 2.

| First Author, Year                      | Q1  | Q2 | Q3  | Q4          | Q5  | Q6  | Q7  | Q8  | Q9          | Q10 | Q11 | Q12 | Q13 | Q14 | Q15 | Q16 | All            |
|-----------------------------------------|-----|----|-----|-------------|-----|-----|-----|-----|-------------|-----|-----|-----|-----|-----|-----|-----|----------------|
| He, 2006 <sup>72</sup>                  | Yes | No | Yes | Yes         | No  | Yes | No  | Yes | Yes         | No  | Yes | Yes | Yes | Yes | Yes | Yes | Critically low |
| Strazzullo, 2009 <sup>55</sup>          | Yes | No | No  | Yes         | Yes | Yes | No  | Yes | Yes         | No  | Yes | No  | Yes | Yes | Yes | No  | Critically low |
| Strazzullo, 2010 <sup>102</sup>         | Yes | No | Yes | Partial Yes | No  | Yes | No  | Yes | Yes         | No  | Yes | No  | Yes | Yes | No  | Yes | Critically low |
| Shen, 2012 <sup>84</sup>                | Yes | No | Yes | No          | No  | Yes | No  | Yes | Yes         | No  | Yes | No  | No  | Yes | Yes | No  | Critically low |
| Dong, 2012 <sup>111</sup>               | Yes | No | Yes | No          | No  | Yes | No  | Yes | Partial Yes | No  | Yes | No  | Yes | Yes | Yes | Yes | Critically low |
| Larsson, 2013 <sup>89</sup>             | Yes | No | Yes | Yes         | No  | Yes | No  | Yes | No          | No  | Yes | No  | Yes | Yes | Yes | Yes | Critically low |
| Chen, 2013 (1) <sup>88</sup>            | Yes | No | Yes | Partial Yes | No  | Yes | No  | Yes | Yes         | No  | Yes | No  | Yes | Yes | Yes | No  | Critically low |
| Chen, 2013 (2) <sup>96</sup>            | Yes | No | Yes | No          | No  | Yes | No  | Yes | Yes         | No  | Yes | Yes | Yes | Yes | Yes | Yes | Critically low |
| Psaltopoulou, 2013 <sup>86</sup>        | Yes | No | Yes | No          | No  | Yes | No  | Yes | Yes         | No  | Yes | No  | No  | Yes | Yes | No  | Critically low |
| Marí nez-Gonza ´lez, 2014 <sup>73</sup> | Yes | No | Yes | Yes         | Yes | Yes | No  | Yes | Yes         | No  | Yes | No  | Yes | Yes | Yes | Yes | Critically low |
| Shi, 2014 <sup>74</sup>                 | Yes | No | No  | Yes         | Yes | Yes | No  | Yes | Yes         | No  | Yes | No  | Yes | Yes | Yes | Yes | Critically low |
| Cai, 2015 <sup>97</sup>                 | Yes | No | Yes | Yes         | No  | Yes | No  | Yes | Yes         | No  | Yes | No  | Yes | Yes | Yes | Yes | Critically low |
| Fang, 2015 <sup>75</sup>                | Yes | No | Yes | Yes         | Yes | Yes | No  | Yes | Yes         | No  | Yes | No  | Yes | Yes | Yes | Yes | Critically low |
| Wu, 2015 <sup>76</sup>                  | Yes | No | Yes | Yes         | Yes | Yes | No  | Yes | Yes         | No  | Yes | No  | Yes | Yes | Yes | Yes | Critically low |
| de Goede, 2016 <sup>77</sup>            | Yes | No | Yes | Yes         | No  | Yes | No  | Yes | Yes         | No  | Yes | No  | Yes | Yes | Yes | Yes | Critically low |
| Larsson, 2016 <sup>117</sup>            | Yes | No | Yes | No          | Yes | Yes | No  | Yes | Yes         | No  | Yes | No  | No  | Yes | Yes | Yes | Critically low |
| Cheng, 2016 <sup>98</sup>               | Yes | No | Yes | Yes         | Yes | Yes | No  | Yes | Yes         | No  | Yes | No  | Yes | Yes | Yes | No  | Critically low |
| Lou, 2016 <sup>78</sup>                 | Yes | No | Yes | Yes         | Yes | No  | No  | Yes | Yes         | No  | Yes | No  | Yes | Yes | Yes | Yes | Critically low |
| Shao, 2016 <sup>79</sup>                | Yes | No | No  | Yes         | No  | Yes | Yes | Yes | Yes         | No  | Yes | No  | Yes | Yes | Yes | No  | Critically low |
| Tang, 2016 <sup>90</sup>                | Yes | No | Yes | Yes         | No  | Yes | No  | Yes | Yes         | No  | Yes | No  | Yes | Yes | Yes | Yes | Critically low |
| Vinceti, 2016 <sup>91</sup>             | Yes | No | Yes | Yes         | Yes | Yes | No  | Yes | Yes         | No  | Yes | No  | Yes | Yes | Yes | Yes | Critically low |

|                                |     |     |     |             |     |     |     |         |             |    |     |     |     |     |     |     |                |
|--------------------------------|-----|-----|-----|-------------|-----|-----|-----|---------|-------------|----|-----|-----|-----|-----|-----|-----|----------------|
| Zhang, 2016 <sup>119</sup>     | Yes | No  | Yes | Yes         | No  | No  | No  | Yes     | Yes         | No | Yes | No  | No  | Yes | Yes | Yes | Critically low |
| Liu, 2016 <sup>105</sup>       | Yes | No  | Yes | Partial Yes | No  | Yes | No  | Partial | Yes         | No | Yes | No  | No  | Yes | No  | Yes | Critically low |
| Valtorta, 2016 <sup>112</sup>  | Yes | Yes | Yes | Yes         | No  | Yes | No  | Yes     | Yes         | No | Yes | Yes | Yes | Yes | Yes | Yes | Critically low |
| Kyu, 2016 <sup>104</sup>       | Yes | No  | Yes | Partial Yes | No  | Yes | No  | Yes     | Yes         | No | Yes | No  | Yes | Yes | Yes | Yes | Critically low |
| Li 2016 <sup>103</sup>         | Yes | No  | Yes | Yes         | No  | No  | No  | Partial | Yes         | No | Yes | No  | No  | Yes | No  | Yes | Critically low |
| Dzhambov, 2016 <sup>114</sup>  | Yes | No  | Yes | Yes         | Yes | No  | No  | Partial | Yes         | No | Yes | No  | Yes | Yes | Yes | Yes | Critically low |
| Gholami, 2017 <sup>3</sup>     | Yes | No  | Yes | No          | No  | Yes | No  | Yes     | Yes         | No | Yes | No  | Yes | Yes | Yes | Yes | Critically low |
| Kim, 2017 <sup>57</sup>        | Yes | No  | Yes | Yes         | Yes | No  | No  | Yes     | Yes         | No | Yes | No  | Yes | Yes | Yes | Yes | Critically low |
| Yuan, 2017 <sup>80</sup>       | Yes | No  | Yes | Yes         | Yes | Yes | No  | Yes     | Yes         | No | Yes | No  | Yes | Yes | Yes | Yes | Critically low |
| Mohammadi, 2018 <sup>81</sup>  | Yes | No  | Yes | Partial Yes | Yes | Yes | No  | Yes     | Yes         | No | Yes | No  | Yes | Yes | Yes | Yes | Critically low |
| He, 2017 <sup>105</sup>        | Yes | No  | Yes | Yes         | No  | Yes | No  | Yes     | Yes         | No | Yes | Yes | Yes | Yes | Yes | Yes | Critically low |
| Cheng, 2018 (1) <sup>92</sup>  | Yes | No  | Yes | Yes         | Yes | Yes | No  | Yes     | Yes         | No | Yes | No  | Yes | Yes | Yes | Yes | Critically low |
| Cheng, 2018 (2) <sup>100</sup> | Yes | No  | Yes | Yes         | No  | Yes | No  | Yes     | Yes         | No | Yes | No  | Yes | Yes | Yes | Yes | Critically low |
| Feng, 2018 <sup>87</sup>       | Yes | No  | Yes | Yes         | No  | Yes | No  | Yes     | Yes         | No | Yes | No  | Yes | Yes | Yes | Yes | Critically low |
| Xu, 2018 <sup>107</sup>        | Yes | No  | Yes | Yes         | Yes | Yes | No  | Yes     | Yes         | No | Yes | No  | Yes | Yes | No  | Yes | Critically low |
| Islam, 2018 <sup>108</sup>     | Yes | No  | Yes | Yes         | Yes | Yes | No  | Partial | Yes         | No | Yes | No  | Yes | Yes | Yes | Yes | Critically low |
| Jayedi, 2019 <sup>118</sup>    | Yes | No  | No  | Yes         | Yes | Yes | No  | Yes     | Yes         | No | Yes | No  | Yes | No  | Yes | Yes | Critically low |
| Zhao, 2019 <sup>82</sup>       | Yes | No  | Yes | Yes         | No  | Yes | Yes | Yes     | Yes         | No | Yes | No  | Yes | Yes | Yes | Yes | Low            |
| Pan, 2019 <sup>109</sup>       | Yes | No  | Yes | Yes         | No  | Yes | No  | Yes     | Yes         | No | Yes | No  | Yes | Yes | Yes | Yes | Critically low |
| Chen, 2019 <sup>113</sup>      | Yes | Yes | Yes | Yes         | No  | Yes | No  | Yes     | Partial Yes | No | Yes | No  | Yes | No  | No  | Yes | Critically low |
| Quan, 2019 <sup>110</sup>      | Yes | No  | Yes | Yes         | Yes | Yes | No  | Yes     | Yes         | No | Yes | No  | Yes | Yes | Yes | Yes | Critically low |
| Chen, 2020 <sup>93</sup>       | Yes | No  | Yes | Yes         | Yes | Yes | No  | Yes     | Yes         | No | Yes | No  | Yes | Yes | Yes | Yes | Critically low |
| Kang, 2020 <sup>101</sup>      | Yes | Yes | Yes | Yes         | Yes | Yes | No  | Yes     | Yes         | No | Yes | No  | Yes | Yes | Yes | Yes | Low            |
| Shi, 2020 <sup>94</sup>        | Yes | Yes | Yes | Yes         | No  | Yes | No  | Yes     | Yes         | No | Yes | No  | Yes | Yes | Yes | Yes | Low            |

|                          |     |    |     |             |     |     |    |     |     |    |     |    |     |     |     |     |                |
|--------------------------|-----|----|-----|-------------|-----|-----|----|-----|-----|----|-----|----|-----|-----|-----|-----|----------------|
| Tang, 2020 <sup>90</sup> | Yes | No | Yes | Yes         | No  | No  | No | Yes | Yes | No | Yes | No | Yes | Yes | Yes | Yes | Critically low |
| Zhao, 2020 <sup>95</sup> | Yes | No | Yes | Yes         | No  | Yes | No | Yes | Yes | No | Yes | No | Yes | Yes | Yes | Yes | Critically low |
| Shao, 2021 <sup>29</sup> | Yes | No | Yes | Partial Yes | No  | No  | No | Yes | Yes | No | Yes | No | Yes | Yes | Yes | Yes | Critically low |
| Niu, 2021 <sup>115</sup> | Yes | No | Yes | Yes         | Yes | No  | No | Yes | Yes | No | Yes | No | Yes | Yes | Yes | Yes | Critically low |

AMSTAR, assess the methodological quality of systematic reviews; Q: Question; Q1: Did the research questions and inclusion criteria for the review include the components of PICO?, Q2: Did the report of the review contain an explicit statement that the review methods were established prior to the conduct of the review and did the report justify any significant deviations from the protocol?, Q3: Did the review authors explain their selection of the study designs for inclusion in the review?, Q4: Did the review authors use a comprehensive literature search strategy?, Q5: Did the review authors perform study selection in duplicate?, Q6: Did the review authors perform data extraction in duplicate?, Q7: Did the review authors provide a list of excluded studies and justify the exclusions?, Q8: Did the review authors describe the included studies in adequate detail?, Q9: Did the review authors use a satisfactory technique for assessing the risk of bias (RoB) in individual studies that were included in the review?, Q10: Did the review authors report on the sources of funding for the studies included in the review?, Q11: If meta-analysis was performed, did the review authors use appropriate methods for statistical combination of results?, Q12: If meta-analysis was performed, did the review authors assess the potential impact of RoB in individual studies on the results of the meta-analysis or other evidence synthesis?, Q13: Did the review authors account for RoB in primary studies when interpreting/discussing the results of the review?, Q14: Did the review authors provide a satisfactory explanation for, and discussion of, any heterogeneity observed in the results of the review?, Q15: If they performed quantitative synthesis did the review authors carry out an adequate investigation of publication bias (small study bias) and discuss its likely impact on the results of the review?, Q16: Did the review authors report any potential sources of conflict of interest, including any funding they received for conducting the review?

**Table S10.** Sensitivity analyses for associations with strong, high suggestive or suggestive evidence.

| Exposure                                                                                                                                                                                         | First Author,<br>Year           | No. of primary<br>cohort study | Main Comparison | Credibility assessment |                       |                           |                       |              |                           |    |      |          |     |
|--------------------------------------------------------------------------------------------------------------------------------------------------------------------------------------------------|---------------------------------|--------------------------------|-----------------|------------------------|-----------------------|---------------------------|-----------------------|--------------|---------------------------|----|------|----------|-----|
|                                                                                                                                                                                                  |                                 |                                |                 | SHR (95% CI)           | <i>P</i> value        | <i>I</i> <sup>2</sup> (%) | $\tau^2$              | 95% PI       | Egger's <i>P</i><br>value | O  | E    | <i>P</i> | ESF |
| <b>Exclusion of primary studies with number of study participants lower than 25th percentile (applicable to those meta-analyses with evidence of small-study effects in primary)<sup>a</sup></b> |                                 |                                |                 |                        |                       |                           |                       |              |                           |    |      |          |     |
| Chocolate                                                                                                                                                                                        | Yuan, 2017 <sup>80</sup>        | 1                              | High vs low     | NA                     | NA                    | NA                        | NA                    | NA           | NA                        | NA | NA   | NA       | NA  |
| Magnesium                                                                                                                                                                                        | Zhao, 2020 <sup>95</sup>        | 0                              | High vs low     | NA                     | NA                    | NA                        | NA                    | NA           | NA                        | NA | NA   | NA       | NA  |
| Smoking                                                                                                                                                                                          | Pan, 2019 <sup>109</sup>        | 0                              | High vs low     | NA                     | NA                    | NA                        | NA                    | NA           | NA                        | NA | NA   | NA       | NA  |
| <b>Primary studies adjusted for confounding variables</b>                                                                                                                                        |                                 |                                |                 |                        |                       |                           |                       |              |                           |    |      |          |     |
| Total meat                                                                                                                                                                                       | Kim, 2017 <sup>57</sup>         | 4                              | High vs low     | 1.18 (1.09, 1.28)      | < 0.0001              | 0.00                      | < 0.00001             | (0.99, 1.41) | 0.50                      | 2  | NA   | NA       | NA  |
| Processed meat                                                                                                                                                                                   |                                 | 5                              | High vs low     | 1.16 (1.07, 1.26)      | < 0.0001              | 16.00                     | 1.40×10 <sup>-3</sup> | (0.97, 1.39) | 0.40                      | 3  | NA   | NA       | NA  |
| Processed meat (IS)                                                                                                                                                                              | Kim, 2017 <sup>57</sup>         | 5                              | High vs low     | 1.17 (1.07, 1.28)      | < 0.0001              | 0.00                      | 0.00                  | (1.01, 1.35) | 0.22                      | 2  | NA   | NA       | NA  |
| Chocolate                                                                                                                                                                                        | Yuan, 2017 <sup>80</sup>        | 7                              | High vs low     | 0.83 (0.77, 0.89)      | < 0.0001              | 0.00                      | < 0.00001             | (0.75, 0.92) | 2.00×10 <sup>-3</sup>     | 5  | 2.62 | 0.15     | No  |
| DASH                                                                                                                                                                                             | Feng, 2018 <sup>87</sup>        | 6                              | High vs low     | 0.87 (0.79, 0.96)      | 5.00×10 <sup>-3</sup> | 65.00                     | 8.70×10 <sup>-3</sup> | (0.65, 1.17) | 0.30                      | 4  | NA   | NA       | NA  |
| Vitamin C                                                                                                                                                                                        | Chen, 2013 <sup>88</sup>        | 6                              | High vs low     | 0.81 (0.72, 0.91)      | < 0.0001              | 0.00                      | 0.00                  | (0.69, 0.95) | 0.78                      | 1  | NA   | NA       | NA  |
| Sodium                                                                                                                                                                                           | Jayedi, 2019 <sup>118</sup>     | 10                             | Dose-response   | 1.19 (1.09, 1.31)      | < 0.0001              | 54.00                     | 0.01                  | (0.92, 1.54) | 0.18                      | 5  | NA   | NA       | NA  |
| Magnesium                                                                                                                                                                                        | Zhao, 2020 <sup>95</sup>        | 12                             | High vs low     | 0.90 (0.85, 0.96)      | 2.00×10 <sup>-3</sup> | 0.00                      | 0.00                  | (0.84, 0.97) | 0.07                      | 1  | NA   | NA       | NA  |
| Obesity <sup>b</sup>                                                                                                                                                                             | Strazzullo, 2010 <sup>102</sup> | 22                             | With vs without | 1.64 (1.36, 1.99)      | < 0.0001              | 88.00                     | NA                    | NA           | NA                        | NA | NA   | NA       | NA  |
| PP                                                                                                                                                                                               |                                 | 6                              |                 | 1.14 (1.09, 1.20)      | < 0.0001              | 35.00                     | 1.10×10 <sup>-3</sup> | (1.02, 1.28) | 0.47                      | 5  | NA   | NA       | NA  |
| SBP                                                                                                                                                                                              | Liu, 2016 <sup>105</sup>        | 6                              | Dose-response   | 1.22 (1.11, 1.35)      | < 0.0001              | 85.00                     | 0.01                  | (0.88, 1.69) | 0.33                      | 5  | NA   | NA       | NA  |
| DBP                                                                                                                                                                                              |                                 | 6                              |                 | 1.23 (1.12, 1.35)      | < 0.0001              | 71.00                     | 8.10×10 <sup>-3</sup> | (0.93, 1.63) | 0.60                      | 5  | NA   | NA       | NA  |
| Sleep duration                                                                                                                                                                                   | He, 2017 <sup>105</sup>         | 11                             | Dose-response   | 1.37 (1.19, 1.57)      | < 0.0001              | 70.00                     | 0.04                  | (0.86, 2.17) | 0.57                      | 8  | NA   | NA       | NA  |
| Sleep duration (IS)                                                                                                                                                                              | He, 2017 <sup>105</sup>         | 4                              | Dose-response   | 1.60 (1.32, 1.93)      | < 0.0001              | 54.1                      | 0.02                  | (0.77, 3.32) | 0.59                      | 3  | NA   | NA       | NA  |



|                                          |                                 |    |                 |                   |                       |       |                       |              |                       |    |      |                       |     |
|------------------------------------------|---------------------------------|----|-----------------|-------------------|-----------------------|-------|-----------------------|--------------|-----------------------|----|------|-----------------------|-----|
| Smoking                                  | Pan, 2019 <sup>109</sup>        | 6  | High vs low     | 1.35 (1.22, 1.49) | < 0.0001              | 0.00  | 0.00                  | (1.17, 1.55) | 0.57                  | 3  | 4.86 | 0.08                  | Yes |
| Smoking (IS)                             | Pan, 2019 <sup>109</sup>        | 4  | High vs low     | 1.49 (1.28, 1.74) | < 0.0001              | 0.00  | 0.00                  | (1.06, 2.09) | 0.18                  | 3  | 1.74 | 0.27                  | No  |
| Depression                               | Dong, 2012 <sup>111</sup>       | 7  | High vs low     | 1.47 (1.18, 1.84) | 1.00×10 <sup>-3</sup> | 64.50 | 0.05                  | (0.76, 2.83) | 0.08                  | 5  | NA   | NA                    | NA  |
| PM <sub>2.5</sub>                        | Niu, 2021 <sup>115</sup>        | 6  | Dose-response   | 1.15 (1.10, 1.21) | < 0.0001              | 32.60 | 1.10×10 <sup>-3</sup> | (1.03, 1.29) | 0.07                  | 5  | NA   | NA                    | NA  |
| <b>Primary studies with high quality</b> |                                 |    |                 |                   |                       |       |                       |              |                       |    |      |                       |     |
| Total meat <sup>c</sup>                  | Kim, 2017 <sup>57</sup>         | 4  | High vs low     | 1.18 (1.09, 1.28) | < 0.0001              | 0.00  | < 0.00001             | (0.99, 1.41) | 0.50                  | 2  | NA   | NA                    | NA  |
| Processed meat <sup>c</sup>              |                                 | 5  | High vs low     | 1.16 (1.07, 1.26) | < 0.0001              | 15.90 | 1.40×10 <sup>-3</sup> | (0.97, 1.39) | 0.40                  | 3  | NA   | NA                    | NA  |
| Processed meat (IS) <sup>c</sup>         | Kim, 2017 <sup>57</sup>         | 5  | High vs low     | 1.17 (1.07, 1.28) | < 0.0001              | 0.00  | 0.00                  | (1.01, 1.35) | 0.22                  | 2  | NA   | NA                    | NA  |
| Chocolate <sup>c</sup>                   | Yuan, 2017 <sup>80</sup>        | 7  | High vs low     | 0.83 (0.77, 0.89) | < 0.0001              | 0.00  | < 0.00001             | (0.75, 0.92) | 2.00×10 <sup>-3</sup> | 5  | 2.62 | 0.15                  | No  |
| DASH <sup>c</sup>                        | Feng, 2018 <sup>87</sup>        | 12 | High vs low     | 0.87 (0.81, 0.93) | < 0.0001              | 48.90 | 5.30×10 <sup>-3</sup> | (0.72, 1.04) | 0.16                  | 7  | NA   | NA                    | NA  |
| Vitamin C <sup>d</sup>                   | Feng, 2018 <sup>20</sup>        | 12 | High vs low     | 0.81 (0.73, 0.90) | < 0.0001              | 3.10  | 1.00×10 <sup>-3</sup> | (0.71, 0.93) | 0.62                  | 3  | 0.75 | 2.04×10 <sup>-3</sup> | Yes |
| Sodium <sup>c</sup>                      | Jayedi, 2019 <sup>118</sup>     | 13 | Dose-response   | 1.15 (1.07, 1.23) | < 0.0001              | 51.90 | 7.50×10 <sup>-3</sup> | (0.93, 1.41) | 0.12                  | 2  | NA   | NA                    | NA  |
| Magnesium <sup>c</sup>                   | Zhao, 2020 <sup>95</sup>        | 15 | High vs low     | 0.89 (0.83, 0.94) | < 0.0001              | 1.20  | 2.00×10 <sup>-4</sup> | (0.82, 0.95) | 5.00×10 <sup>-3</sup> | 2  | NA   | NA                    | NA  |
| Obesity <sup>b</sup>                     | Strazzullo, 2010 <sup>102</sup> | 22 | With vs without | 1.64 (1.36, 1.99) | < 0.0001              | 88.00 | NA                    | NA           | NA                    | NA | NA   | NA                    | NA  |
| PP <sup>c</sup>                          |                                 | 6  |                 | 1.14 (1.09, 1.20) | < 0.0001              | 35.40 | 1.10×10 <sup>-3</sup> | (1.02, 1.28) | 0.47                  | 5  | NA   | NA                    | NA  |
| SBP <sup>c</sup>                         | Liu, 2016 <sup>105</sup>        | 6  | Dose-response   | 1.22 (1.11, 1.35) | < 0.0001              | 85.30 | 0.01                  | (0.88, 1.69) | 0.33                  | 5  | NA   | NA                    | NA  |
| DBP <sup>c</sup>                         |                                 | 6  |                 | 1.23 (1.12, 1.35) | < 0.0001              | 71.00 | 8.10×10 <sup>-3</sup> | (0.93, 1.63) | 0.60                  | 5  | NA   | NA                    | NA  |
| Sleep duration                           | He, 2017 <sup>105</sup>         | 10 | Dose-response   | 1.37 (1.18, 1.59) | < 0.0001              | 72.30 | 0.04                  | (0.83, 2.24) | 0.69                  | 8  | NA   | NA                    | NA  |
| Sleep duration (IS) <sup>c</sup>         | He, 2017 <sup>105</sup>         | 4  | Dose-response   | 1.60 (1.32, 1.93) | < 0.0001              | 54.10 | 0.02                  | (0.77, 3.32) | 0.59                  | 3  | NA   | NA                    | NA  |
| Smoking <sup>d</sup>                     | Pan, 2019 <sup>109</sup>        | 9  | High vs low     | 1.71 (1.37, 2.13) | < 0.0001              | 72.80 | 0.06                  | (0.89, 3.28) | 0.07                  | 6  | NA   | NA                    | NA  |
| Smoking (IS) <sup>d</sup>                | Pan, 2019 <sup>109</sup>        | 6  | High vs low     | 1.56 (1.34, 1.81) | < 0.0001              | 0.00  | 0.00                  | (1.26, 1.93) | 0.46                  | 4  | NA   | NA                    | NA  |
| Walking pace <sup>e</sup>                | Quan, 2019 <sup>110</sup>       | 7  | High vs low     | 0.56 (0.48, 0.65) | < 0.0001              | 0.00  | < 0.00001             | (0.46, 0.69) | 1.00                  | 4  | 3.07 | 0.57                  | No  |
| Depression <sup>d</sup>                  | Dong, 2012 <sup>111</sup>       | 17 | High vs low     | 1.32 (1.17, 1.48) | < 0.0001              | 55.20 | 0.01                  | (0.92, 1.88) | 0.17                  | 9  | NA   | NA                    | NA  |
| PM <sub>2.5</sub> <sup>c</sup>           | Niu, 2021 <sup>115</sup>        | 8  | Dose-response   | 1.14 (1.08, 1.21) | < 0.0001              | 40.20 | 2.10×10 <sup>-3</sup> | (1.01, 1.30) | 0.32                  | 5  | NA   | NA                    | NA  |

---

Abbreviations: SHR, summary hazard ratio; O, observed number of significant; E, expected value of significant finding; CI, confidence interval; ESF, Excess significant finding; IS, ischemic stroke; NA, Not Applicable;

DASH, dietary approaches to stop hypertension; PP, pulse pressure; SBP, systolic blood pressure; DBP, diastolic blood pressure.

<sup>a</sup>Not performed due to limited number of primary studies.

<sup>b</sup>Data extracted from published meta-analysis, no re-analysis possible.

<sup>c</sup>Meta-analysis reported all good-quality studies.

<sup>d</sup>No information on quality assessment of primary studies.

**Table S11.** Regional distribution of strong, highly suggestive and suggestive evidence.

| First Author, Year                            | Main Comparison | Exposure       | Primary analysis  | QES               | Countries or regions              |
|-----------------------------------------------|-----------------|----------------|-------------------|-------------------|-----------------------------------|
| <b>Food factors</b>                           |                 |                |                   |                   |                                   |
| Kim, 2017 <sup>57</sup>                       | High vs low     | Total meat     | highly suggestive | highly suggestive | Sweden; USA                       |
|                                               |                 | Processed meat | highly suggestive | highly suggestive | Spain; Sweden; USA                |
| Kim, 2017 <sup>57</sup> (IS)                  | High vs low     | Processed meat | suggestive        | suggestive        | Spain; Sweden; USA                |
| Yuan, 2017 <sup>80</sup>                      | High vs low     | Chocolate      | highly suggestive | highly suggestive | Germany; Japan; Sweden; UK; USA   |
| <b>Dietary behaviours</b>                     |                 |                |                   |                   |                                   |
| Feng, 2018 <sup>87</sup>                      | High vs low     | DASH           | suggestive        | weak              | Multinational <sup>a</sup>        |
| <b>Micronutrients</b>                         |                 |                |                   |                   |                                   |
| Chen, 2013 <sup>88</sup>                      | High vs low     | Vitamin C      | suggestive        | suggestive        | Multinational                     |
| Jayedi, 2019 <sup>118</sup>                   | Dose-response   | Sodium         | highly suggestive | highly suggestive | Multinational                     |
| Zhao, 2020 <sup>95</sup>                      | High vs low     | Magnesium      | suggestive        | weak              | Multinational                     |
| <b>Factors of physical health Management</b>  |                 |                |                   |                   |                                   |
| Strazzullo, 2010 <sup>102</sup>               | High vs low     | Obesity        | highly suggestive | highly suggestive | China; Finland; Sweden; USA       |
| Liu, 2016 <sup>105</sup>                      | Dose-response   | PP             | highly suggestive | highly suggestive | China; Denmark; Japan; USA        |
|                                               |                 | SBP            | highly suggestive | highly suggestive | China; Denmark; Japan; USA        |
|                                               |                 | DBP            | highly suggestive | highly suggestive | China; Denmark; Japan; USA        |
|                                               |                 | sleep duration | highly suggestive | highly suggestive | Multinational                     |
| He, 2017 <sup>106</sup>                       | Dose-response   | sleep duration | highly suggestive | highly suggestive | Multinational                     |
| He, 2017 <sup>106</sup> (IS)                  | Dose-response   | sleep duration | highly suggestive | highly suggestive | China; Japan                      |
| Pan, 2019 <sup>109</sup>                      | High vs low     | smoking        | highly suggestive | highly suggestive | China; Japan; Norway; Sweden; USA |
| Pan, 2019 <sup>109</sup> (IS)                 | High vs low     | smoking        | suggestive        | suggestive        | China; Japan; Sweden; USA         |
| Quan, 2019 <sup>110</sup>                     | High vs low     | Walking pace   | strong            | strong            | UK; USA                           |
| <b>Factors of emotional health Management</b> |                 |                |                   |                   |                                   |

---

|                                            |               |                   |            |            |                                          |
|--------------------------------------------|---------------|-------------------|------------|------------|------------------------------------------|
| Dong, 2012 <sup>111</sup>                  | High vs low   | Depression        | suggestive | weak       | Finland; Japan; Netherlands; Sweden; USA |
| <b>Factors of environmental management</b> |               |                   |            |            |                                          |
| Niu, 2021 <sup>115</sup>                   | Dose-response | PM <sub>2.5</sub> | suggestive | suggestive | Multinational                            |

---

Abbreviations: QES, quality of evidence after sensitivity analyses.

<sup>a</sup>More than five countries.

**References:**

1. Dauchet L, Amouyel P, Dallongeville J. Fruit and vegetable consumption and risk of stroke: a meta-analysis of cohort studies. *Neurology* 2005;65:1193-7.
2. Afshin A, Micha R, Khatibzadeh S, et al. Consumption of nuts and legumes and risk of incident ischemic heart disease, stroke, and diabetes: a systematic review and meta-analysis. *Am J Clin Nutr* 2014;100:278-88.
3. Gholami F, Khoramdad M, Shakiba E, et al. Subgroup dairy products consumption on the risk of stroke and CHD: A systematic review and meta-analysis. *Med J Islam Repub Iran* 2017;31:25.
4. Hu D, Huang J, Wang Y, et al. Dairy foods and risk of stroke: a meta-analysis of prospective cohort studies. *Nutr Metab Cardiovasc Dis* 2014;24:460-9.
5. Mullie P, Pizot C, Autier P. Daily milk consumption and all-cause mortality, coronary heart disease and stroke: a systematic review and meta-analysis of observational cohort studies. *BMC Public Health* 2016;16:1236.
6. Micha R, Wallace SK, Mozaffarian D. Red and processed meat consumption and risk of incident coronary heart disease, stroke, and diabetes mellitus: a systematic review and meta-analysis. *Circulation* 2010;121:2271-83.
7. Larsson SC, Virtamo J, Wolk A. Chocolate consumption and risk of stroke: a prospective cohort of men and meta-analysis. *Neurology* 2012;79:1223-9.
8. Walters MR, Williamson C, Lunn K, et al. Chocolate consumption and risk of stroke: A prospective cohort of men and meta-analysis. *Neurology* 2013;80:1173-4.
9. Qin ZZ, Xu JY, Chen GC, et al. Effects of fatty and lean fish intake on stroke risk: a meta-analysis of prospective cohort studies. *Lipids Health Dis* 2018;17:264.
10. Deng C, Lu Q, Gong B, et al. Stroke and food groups: an overview of systematic reviews and meta-analyses. *Public Health Nutr* 2018;21:766-76.
11. Bechthold A, Boeing H, Schwedhelm C, et al. Food groups and risk of coronary heart disease, stroke and heart failure: A systematic review and dose-response meta-analysis of prospective studies. *Crit Rev Food Sci Nutr* 2019;59:1071-90.
12. Xun P, Qin B, Song Y, et al. Fish consumption and risk of stroke and its subtypes: accumulative evidence from a meta-analysis of prospective cohort studies. *Eur J Clin Nutr* 2012;66:1199-207.
13. Larsson SC, Orsini N. Fish consumption and the risk of stroke: a dose-response meta-analysis. *Stroke* 2011;42:3621-3.

14. He K, Song Y, Daviglius ML, et al. Fish consumption and incidence of stroke: a meta-analysis of cohort studies. *Stroke* 2004;35:1538-42.
15. Rong Y, Chen L, Zhu T, et al. Egg consumption and risk of coronary heart disease and stroke: dose-response meta-analysis of prospective cohort studies. *BMJ* 2013;346:e8539.
16. Alexander DD, Miller PE, Vargas AJ, et al. Meta-analysis of Egg Consumption and Risk of Coronary Heart Disease and Stroke. *J Am Coll Nutr* 2016;35:704-16.
17. Arab L, Liu W, Elashoff D. Green and black tea consumption and risk of stroke: a meta-analysis. *Stroke* 2009;40:1786-92.
18. Liu PM, Dosieah S, Luo NS, et al. [Alcohol intake and stroke in Eastern Asian men:a systemic review and meta-analysis of 17 prospective cohort studies]. *Zhonghua Yi Xue Za Zhi* 2010;90:2834-8.
19. Patra J, Taylor B, Irving H, et al. Alcohol consumption and the risk of morbidity and mortality for different stroke types--a systematic review and meta-analysis. *BMC Public Health* 2010;10:258.
20. Reynolds K, Lewis B, Nolen JD, et al. Alcohol consumption and risk of stroke: a meta-analysis. *JAMA* 2003;289:579-88.
21. Tsai CF, Anderson N, Thomas B, et al. Risk factors for ischemic stroke and its subtypes in Chinese vs. Caucasians: Systematic review and meta-analysis. *Int J Stroke* 2015;10:485-93.
22. Tsai CF, Anderson N, Thomas B, et al. Comparing Risk Factor Profiles between Intracerebral Hemorrhage and Ischemic Stroke in Chinese and White Populations: Systematic Review and Meta-Analysis. *PLoS One* 2016;11:e0151743.
23. Wang J, Ye DQ, Wang K. [Meta-analysis on the stroke with overweight or obesity, smoking and alcohol drinking in Chinese residents]. *Zhonghua Yu Fang Yi Xue Za Zhi* 2008;42:115-8.
24. Zhang C, Qin YY, Chen Q, et al. Alcohol intake and risk of stroke: a dose-response meta-analysis of prospective studies. *Int J Cardiol* 2014;174:669-77.
25. Zhang X, Shu L, Si C, et al. Dietary Patterns and Risk of Stroke in Adults: A Systematic Review and Meta-analysis of Prospective Cohort Studies. *J Stroke Cerebrovasc Dis* 2015;24:2173-82.
26. Chen X, Zhou L, Zhang Y, et al. Risk factors of stroke in Western and Asian

- countries: a systematic review and meta-analysis of prospective cohort studies. *BMC Public Health* 2014;14:776.
27. Kim B, Nam Y, Kim J, et al. Coffee Consumption and Stroke Risk: A Meta-analysis of Epidemiologic Studies. *Korean J Fam Med* 2012;33:356-65.
  28. Larsson SC, Orsini N. Coffee consumption and risk of stroke: a dose-response meta-analysis of prospective studies. *Am J Epidemiol* 2011;174:993-1001.
  29. Shao C, Tang H, Wang X, et al. Coffee Consumption and Stroke Risk: Evidence from a Systematic Review and Meta-Analysis of more than 2.4 Million Men and Women. *J Stroke Cerebrovasc Dis* 2021;30:105452.
  30. Jeffers BW, Robbins J, Bhambri R. Efficacy of Calcium Channel Blockers Versus Other Classes of Antihypertensive Medication in the Treatment of Hypertensive Patients With Previous Stroke and/or Coronary Artery Disease: A Systematic Review and Meta-Analysis. *Am J Ther* 2017;24:e68-e80.
  31. Tian DY, Tian J, Shi CH, et al. Calcium intake and the risk of stroke: an up-dated meta-analysis of prospective studies. *Asia Pac J Clin Nutr* 2015;24:245-52.
  32. Erratum for Adebamowo et al. Association between intakes of magnesium, potassium, and calcium and risk of stroke: 2 cohorts of US women and updated meta-analyses. *Am J Clin Nutr* 2015;101:1269-77. *Am J Clin Nutr* 2015;102:981-2.
  33. Adebamowo SN, Spiegelman D, Willett WC, et al. Association between intakes of magnesium, potassium, and calcium and risk of stroke: 2 cohorts of US women and updated meta-analyses. *Am J Clin Nutr* 2015;101:1269-77.
  34. D'Elia L, Barba G, Cappuccio FP, et al. Potassium intake, stroke, and cardiovascular disease a meta-analysis of prospective studies. *J Am Coll Cardiol* 2011;57:1210-9.
  35. D'Elia L, Iannotta C, Sabino P, et al. Potassium-rich diet and risk of stroke: updated meta-analysis. *Nutr Metab Cardiovasc Dis* 2014;24:585-7.
  36. Larsson SC, Orsini N, Wolk A. Dietary potassium intake and risk of stroke: a dose-response meta-analysis of prospective studies. *Stroke* 2011;42:2746-50.
  37. Larsson SC, Orsini N, Wolk A. Dietary magnesium intake and risk of stroke: a meta-analysis of prospective studies. *Am J Clin Nutr* 2012;95:362-6.
  38. Nie ZL, Wang ZM, Zhou B, et al. Magnesium intake and incidence of stroke: meta-analysis of cohort studies. *Nutr Metab Cardiovasc Dis* 2013;23:169-76.

39. Zhao B, Hu L, Dong Y, et al. The Effect of Magnesium Intake on Stroke Incidence: A Systematic Review and Meta-Analysis With Trial Sequential Analysis. *Front Neurol* 2019;10:852.
40. Cheng P, Wang J, Shao W, et al. Can dietary saturated fat be beneficial in prevention of stroke risk? A meta-analysis. *Neurol Sci* 2016;37:1089-98.
41. Muto M, Ezaki O. High Dietary Saturated Fat is Associated with a Low Risk of Intracerebral Hemorrhage and Ischemic Stroke in Japanese but not in Non-Japanese: A Review and Meta-Analysis of Prospective Cohort Studies. *J Atheroscler Thromb* 2018;25:375-92.
42. Diep L, Kwagyan J, Kurantsin-Mills J, et al. Association of physical activity level and stroke outcomes in men and women: a meta-analysis. *J Womens Health (Larchmt)* 2010;19:1815-22.
43. Lee CD, Folsom AR, Blair SN. Physical activity and stroke risk: a meta-analysis. *Stroke* 2003;34:2475-81.
44. Oczkowski W. Complexity of the relation between physical activity and stroke: a meta-analysis. *Clin J Sport Med* 2005;15:399.
45. Wendel-Vos GC, Schuit AJ, Feskens EJ, et al. Physical activity and stroke. A meta-analysis of observational data. *Int J Epidemiol* 2004;33:787-98.
46. Leng Y, Cappuccio FP, Wainwright NW, et al. Sleep duration and risk of fatal and nonfatal stroke: a prospective study and meta-analysis. *Neurology* 2015;84:1072-9.
47. Li W, Wang D, Cao S, et al. Sleep duration and risk of stroke events and stroke mortality: A systematic review and meta-analysis of prospective cohort studies. *Int J Cardiol* 2016;223:870-76.
48. Peters SA, Huxley RR, Woodward M. Smoking as a risk factor for stroke in women compared with men: a systematic review and meta-analysis of 81 cohorts, including 3,980,359 individuals and 42,401 strokes. *Stroke* 2013;44:2821-8.
49. Shinton R, Beevers G. Meta-analysis of relation between cigarette smoking and stroke. *BMJ* 1989;298:789-94.
50. Kawada T. Air pollution and the risk of stroke by meta-analysis. *Int J Cardiol* 2014;176:1247-8.
51. Scheers H, Jacobs L, Casas L, et al. Long-Term Exposure to Particulate Matter Air Pollution Is a Risk Factor for Stroke: Meta-Analytical Evidence. *Stroke*



- 2015;46:3058-66.
52. Shah AS, Lee KK, McAllister DA, et al. Short term exposure to air pollution and stroke: systematic review and meta-analysis. *BMJ* 2015;350:h1295.
  53. Zhang XF, Attia J, D'Este C, et al. The relationship between higher blood pressure and ischaemic, haemorrhagic stroke among Chinese and Caucasians: meta-analysis. *Eur J Cardiovasc Prev Rehabil* 2006;13:429-37.
  54. Li XY, Cai XL, Bian PD, et al. High salt intake and stroke: meta-analysis of the epidemiologic evidence. *CNS Neurosci Ther* 2012;18:691-701.
  55. Strazzullo P, D'Elia L, Kandala NB, et al. Salt intake, stroke, and cardiovascular disease: meta-analysis of prospective studies. *BMJ* 2009;339:b4567.
  56. Jayedi A, Ghomashi F, Zargar MS, et al. Dietary sodium, sodium-to-potassium ratio, and risk of stroke: A systematic review and nonlinear dose-response meta-analysis. *Clin Nutr* 2019;38:1092-100.
  57. Kim K, Hyeon J, Lee SA, et al. Role of Total, Red, Processed, and White Meat Consumption in Stroke Incidence and Mortality: A Systematic Review and Meta-Analysis of Prospective Cohort Studies. *J Am Heart Assoc* 2017;6
  58. Park JH, Saposnik G, Ovbiagele B, et al. Effect of B-vitamins on stroke risk among individuals with vascular disease who are not on antiplatelets: A meta-analysis. *Int J Stroke* 2016;11:206-11.
  59. Xie XX, Liu P, Wan FY, et al. Blood pressure lowering and stroke events in type 2 diabetes: A network meta-analysis of randomized controlled trials. *Int J Cardiol* 2016;208:141-6.
  60. Schurks M, Glynn RJ, Rist PM, et al. Effects of vitamin E on stroke subtypes: meta-analysis of randomised controlled trials. *BMJ* 2010;341:c5702.
  61. Zhang C, Chi FL, Xie TH, et al. Effect of B-vitamin supplementation on stroke: a meta-analysis of randomized controlled trials. *PLoS One* 2013;8:e81577.
  62. Wang H, Li M, Xie SH, et al. Visit-to-visit Systolic Blood Pressure Variability and Stroke Risk: A Systematic Review and Meta-analysis. *Curr Med Sci* 2019;39:741-47.
  63. Hu X, Zhou Y, Zhao H, et al. Migraine and the risk of stroke: an updated meta-analysis of prospective cohort studies. *Neurol Sci* 2017;38:33-40.
  64. McHutchison CA, Backhouse EV, Cvoro V, et al. Education, Socioeconomic Status, and Intelligence in Childhood and Stroke Risk in Later Life: A Meta-analysis.

- Epidemiology* 2017;28:608-18.
65. Xu T, Yu X, Ou S, et al. Adherence to Antihypertensive Medications and Stroke Risk: A Dose-Response Meta-Analysis. *J Am Heart Assoc* 2017;6
  66. Rui XD, Sha YQ, Wen S, et al. Serum level of IL-10 and IL-10-1082G/A polymorphism are associated with the risk of ischemic stroke: a meta-analysis. *J Biol Regul Homeost Agents* 2020;34:1445-49.
  67. Zhong C, Zhong X, Xu T, et al. Sex-Specific Relationship Between Serum Uric Acid and Risk of Stroke: A Dose-Response Meta-Analysis of Prospective Studies. *J Am Heart Assoc* 2017;6
  68. Nepal G, Ojha R, Dulal HP, et al. Association between Lys198Asn polymorphism of endothelin-1 gene and ischemic stroke: A meta-analysis. *Brain Behav* 2019;9:e01424.
  69. Sarecka-Hujar B, Kopyta I, Skrzypek M. Lack of Associations Between PAI-1 and FXIII Polymorphisms and Arterial Ischemic Stroke in Children: A Systematic Review and Meta-Analysis. *Clin Appl Thromb Hemost* 2019;25:1076029619869500.
  70. Nie F, Yu M, Liu M, et al. NINJ2 Gene Polymorphisms and Susceptibility to Ischemic Stroke: An Updated Meta-Analysis. *Curr Neurovasc Res* 2019;16:273-87.
  71. DASH diet may lower stroke risk. *Harv Heart Lett* 2016;26:8.
  72. He FJ, Nowson CA, MacGregor GA. Fruit and vegetable consumption and stroke: meta-analysis of cohort studies. *Lancet* 2006;367:320-6.
  73. Martinez-Gonzalez MA, Dominguez LJ, Delgado-Rodriguez M. Olive oil consumption and risk of CHD and/or stroke: a meta-analysis of case-control, cohort and intervention studies. *Br J Nutr* 2014;112:248-59.
  74. Shi ZQ, Tang JJ, Wu H, et al. Consumption of nuts and legumes and risk of stroke: a meta-analysis of prospective cohort studies. *Nutr Metab Cardiovasc Dis* 2014;24:1262-71.
  75. Fang L, Li W, Zhang W, et al. Association between whole grain intake and stroke risk: evidence from a meta-analysis. *Int J Clin Exp Med* 2015;8:16978-83.
  76. Wu D, Guan Y, Lv S, et al. No Evidence of Increased Risk of Stroke with Consumption of Refined Grains: A Meta-analysis of Prospective Cohort Studies. *J Stroke Cerebrovasc Dis* 2015;24:2738-46.

77. de Goede J, Soedamah-Muthu SS, Pan A, et al. Dairy Consumption and Risk of Stroke: A Systematic Review and Updated Dose-Response Meta-Analysis of Prospective Cohort Studies. *J Am Heart Assoc* 2016;5
78. Lou D, Li Y, Yan G, et al. Soy Consumption with Risk of Coronary Heart Disease and Stroke: A Meta-Analysis of Observational Studies. *Neuroepidemiology* 2016;46:242-52.
79. Shao C, Tang H, Zhao W, et al. Nut intake and stroke risk: A dose-response meta-analysis of prospective cohort studies. *Sci Rep* 2016;6:30394.
80. Yuan S, Li X, Jin Y, et al. Chocolate Consumption and Risk of Coronary Heart Disease, Stroke, and Diabetes: A Meta-Analysis of Prospective Studies. *Nutrients* 2017;9
81. Mohammadi H, Jayedi A, Ghaedi E, et al. Dietary poultry intake and the risk of stroke: A dose-response meta-analysis of prospective cohort studies. *Clin Nutr ESPEN* 2018;23:25-33.
82. Zhao W, Tang H, Yang X, et al. Fish Consumption and Stroke Risk: A Meta-Analysis of Prospective Cohort Studies. *J Stroke Cerebrovasc Dis* 2019;28:604-11.
83. Tang H, Cao Y, Yang X, et al. Egg Consumption and Stroke Risk: A Systematic Review and Dose-Response Meta-Analysis of Prospective Studies. *Front Nutr* 2020;7:153.
84. Shen L, Song LG, Ma H, et al. Tea consumption and risk of stroke: a dose-response meta-analysis of prospective studies. *J Zhejiang Univ Sci B* 2012;13:652-62.
85. Larsson SC, Wallin A, Wolk A, et al. Differing association of alcohol consumption with different stroke types: a systematic review and meta-analysis. *BMC Med* 2016;14:178.
86. Psaltopoulou T, Sergentanis TN, Panagiotakos DB, et al. Mediterranean diet, stroke, cognitive impairment, and depression: A meta-analysis. *Ann Neurol* 2013;74:580-91.
87. Feng Q, Fan S, Wu Y, et al. Adherence to the dietary approaches to stop hypertension diet and risk of stroke: A meta-analysis of prospective studies. *Medicine (Baltimore)* 2018;97:e12450.
88. Chen GC, Lu DB, Pang Z, et al. Vitamin C intake, circulating vitamin C and risk of stroke: a meta-analysis of prospective studies. *J Am Heart Assoc*

- 2013;2:e000329.
89. Larsson SC, Orsini N, Wolk A. Dietary calcium intake and risk of stroke: a dose-response meta-analysis. *Am J Clin Nutr* 2013;97:951-7.
  90. Tang Z, Li M, Zhang X, et al. Dietary flavonoid intake and the risk of stroke: a dose-response meta-analysis of prospective cohort studies. *BMJ Open* 2016;6:e008680.
  91. Vinceti M, Filippini T, Crippa A, et al. Meta-Analysis of Potassium Intake and the Risk of Stroke. *J Am Heart Assoc* 2016;5
  92. Cheng P, Wang L, Ning S, et al. Vitamin E intake and risk of stroke: a meta-analysis. *Br J Nutr* 2018;120:1181-88.
  93. Chen L, Li Q, Fang X, et al. Dietary Intake of Homocysteine Metabolism-Related B-Vitamins and the Risk of Stroke: A Dose-Response Meta-Analysis of Prospective Studies. *Adv Nutr* 2020;11:1510-28.
  94. Shi H, Chen H, Zhang Y, et al. 25-Hydroxyvitamin D level, vitamin D intake, and risk of stroke: A dose-response meta-analysis. *Clin Nutr* 2020;39:2025-34.
  95. Zhao B, Zeng L, Zhao J, et al. Association of magnesium intake with type 2 diabetes and total stroke: an updated systematic review and meta-analysis. *BMJ Open* 2020;10:e032240.
  96. Chen GC, Lv DB, Pang Z, et al. Dietary fiber intake and stroke risk: a meta-analysis of prospective cohort studies. *Eur J Clin Nutr* 2013;67:96-100.
  97. Cai X, Wang C, Wang S, et al. Carbohydrate Intake, Glycemic Index, Glycemic Load, and Stroke: A Meta-analysis of Prospective Cohort Studies. *Asia Pac J Public Health* 2015;27:486-96.
  98. Cheng P, Wang J, Shao W. Monounsaturated Fatty Acid Intake and Stroke Risk: A Meta-analysis of Prospective Cohort Studies. *J Stroke Cerebrovasc Dis* 2016;25:1326-34.
  99. Zhang XW, Yang Z, Li M, et al. Association between dietary protein intake and risk of stroke: A meta-analysis of prospective studies. *Int J Cardiol* 2016;223:548-51.
  100. Cheng P, Pan J, Xia J, et al. Dietary cholesterol intake and stroke risk: a meta-analysis. *Oncotarget* 2018;9:25698-707.
  101. Kang ZQ, Yang Y, Xiao B. Dietary saturated fat intake and risk of stroke: Systematic review and dose-response meta-analysis of prospective cohort

- studies. *Nutr Metab Cardiovasc Dis* 2020;30:179-89.
102. Strazzullo P, D'Elia L, Cairella G, et al. Excess body weight and incidence of stroke: meta-analysis of prospective studies with 2 million participants. *Stroke* 2010;41:e418-26.
103. Li M, Huang JT, Tan Y, et al. Shift work and risk of stroke: A meta-analysis. *Int J Cardiol* 2016;214:370-3.
104. Kyu HH, Bachman VF, Alexander LT, et al. Physical activity and risk of breast cancer, colon cancer, diabetes, ischemic heart disease, and ischemic stroke events: systematic review and dose-response meta-analysis for the Global Burden of Disease Study 2013. *BMJ* 2016;354:i3857.
105. Liu FD, Shen XL, Zhao R, et al. Pulse pressure as an independent predictor of stroke: a systematic review and a meta-analysis. *Clin Res Cardiol* 2016;105:677-86.
106. He Q, Sun H, Wu X, et al. Sleep duration and risk of stroke: a dose-response meta-analysis of prospective cohort studies. *Sleep Med* 2017;32:66-74.
107. Xu Z, Yue Y, Bai J, et al. Association between oral contraceptives and risk of hemorrhagic stroke: a meta-analysis of observational studies. *Arch Gynecol Obstet* 2018;297:1181-91.
108. Islam MM, Poly TN, Walther BA, et al. Risk of Hemorrhagic Stroke in Patients Exposed to Nonsteroidal Anti-Inflammatory Drugs: A Meta-Analysis of Observational Studies. *Neuroepidemiology* 2018;51:166-76.
109. Pan B, Jin X, Jun L, et al. The relationship between smoking and stroke: A meta-analysis. *Medicine (Baltimore)* 2019;98:e14872.
110. Quan M, Xun P, Wang R, et al. Walking pace and the risk of stroke: A meta-analysis of prospective cohort studies. *J Sport Health Sci* 2020;9:521-29.
111. Dong JY, Zhang YH, Tong J, et al. Depression and risk of stroke: a meta-analysis of prospective studies. *Stroke* 2012;43:32-7.
112. Valtorta NK, Kanaan M, Gilbody S, et al. Loneliness and social isolation as risk factors for coronary heart disease and stroke: systematic review and meta-analysis of longitudinal observational studies. *Heart* 2016;102:1009-16.
113. Chen H, Zhang B, Xue W, et al. Anger, hostility and risk of stroke: a meta-analysis of cohort studies. *J Neurol* 2019;266:1016-26.
114. Dzhambov AM, Dimitrova DD. Exposure-response relationship between traffic

- noise and the risk of stroke: a systematic review with meta-analysis. *Arh Hig Rada Toksikol* 2016;67:136-51.
115. Niu Z, Liu F, Yu H, et al. Association between exposure to ambient air pollution and hospital admission, incidence, and mortality of stroke: an updated systematic review and meta-analysis of more than 23 million participants. *Environ Health Prev Med* 2021;26:15.
116. Tang H, Cao Y, Yang X, et al. Egg Consumption and Stroke Risk: A Systematic Review and Dose-Response Meta-Analysis of Prospective Studies. *Frontiers in Nutrition* 2020;7
117. Larsson SC, Wallin A, Wolk A, et al. Differing association of alcohol consumption with different stroke types: a systematic review and meta-analysis. *Bmc Medicine* 2016;14
118. Jayedi A, Ghomashi F, Zargar MS, et al. Dietary sodium, sodium-to-potassium ratio, and risk of stroke: A systematic review and nonlinear dose-response meta-analysis. *Clinical Nutrition* 2019;38:1092-100.
119. Zhang XW, Yang Z, Li M, et al. Association between dietary protein intake and risk of stroke: A meta-analysis of prospective studies. *International Journal of Cardiology* 2016;223:548-51.
